# Supplementary material for: Dependence of thermoelectric effects in molecular junctions on the topography of the bottom electrodes
Source: Royal Society of Chemistry journal article supplement (doi:10.1039/d2ta05642a), 2022-01-01
Supplement: d2ta05642a1.pdf [file d2ta05642a1.pdf]

1 Supporting Information for

2

3 **Dependence of Thermoelectric Effects in Molecular Junctions on the Topography of the**

4 **Bottom-Electrodes**

5

6 Wuxian Peng, Zhou Cao, Ningyue Chen, Yu Xie and Yuan Li\*

7

8 Department of Chemistry, Tsinghua University, Beijing 10084, China

9

10 \*Corresponding author, Email: yuanli\_thu@tsinghua.edu.cn

11

12

### 13 S1. Synthesis.

14 **Thiophenol (HS(Ph)<sub>1</sub>)**. We synthesized thiophenol according to a procedure reported in the  
15 literature.<sup>1</sup> Bromobenzene (2.00 mL, 20.00 mmol), ethane-1, 2-dithiol (2.01 mL 24.00 mmol),  
16 KOH (5.60 g, 100.00 mmol) and CuSO<sub>4</sub>·5H<sub>2</sub>O (0.16 g, 5 mol%), were heated at 120 °C in DMF  
17 (50.00 mL) under N<sub>2</sub> for 24 hours. The mixture was extracted three times with CH<sub>2</sub>Cl<sub>2</sub> (3 × 100  
18 mL), washed with brine (3 × 100 mL) after cooling down to room temperature. The combined  
19 organic phases were then dried over Na<sub>2</sub>SO<sub>4</sub>, filtered and concentrated under reduced pressure.  
20 The product thiophenol (0.24 g, yield 11.0%) was then purified by column chromatography  
21 (silica gel, CH<sub>2</sub>Cl<sub>2</sub>/petroleum ether = 1/2 v/v). <sup>1</sup>H NMR (400 MHz, DMSO-d<sub>6</sub>) δ 7.56 – 7.49  
22 (m, 2H), 7.39 (t, J = 7.7 Hz, 2H), 7.34 – 7.25 (m, 1H). HRMS (ESI<sup>+</sup>): m/z calc for C<sub>6</sub>H<sub>7</sub>S  
23 [M+H]<sup>+</sup> 111.0268, found 111.0257.

24

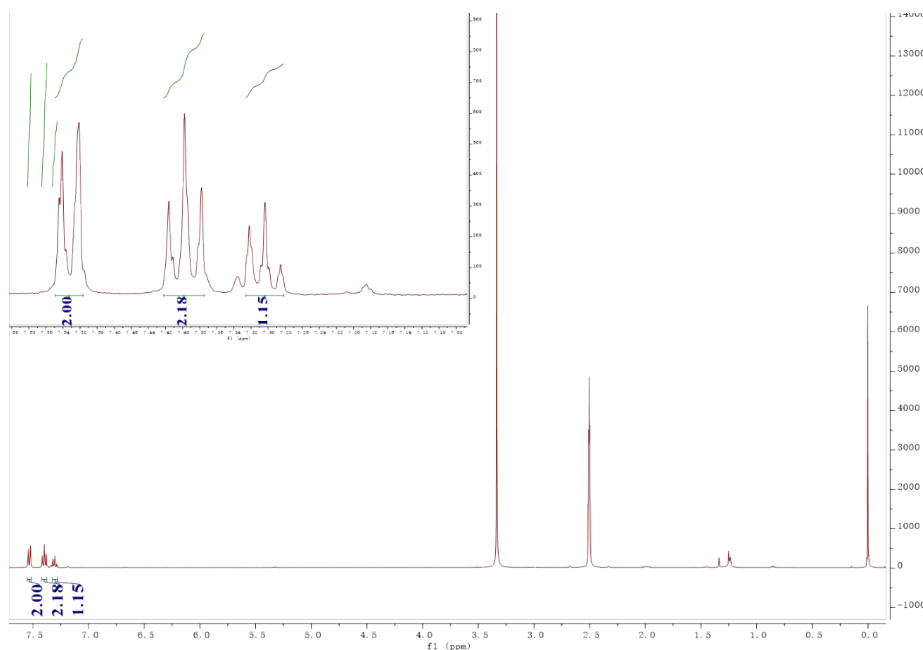

25

26 **Fig. S1.** <sup>1</sup>H NMR spectrum for HS(Ph)<sub>1</sub> in DMSO.

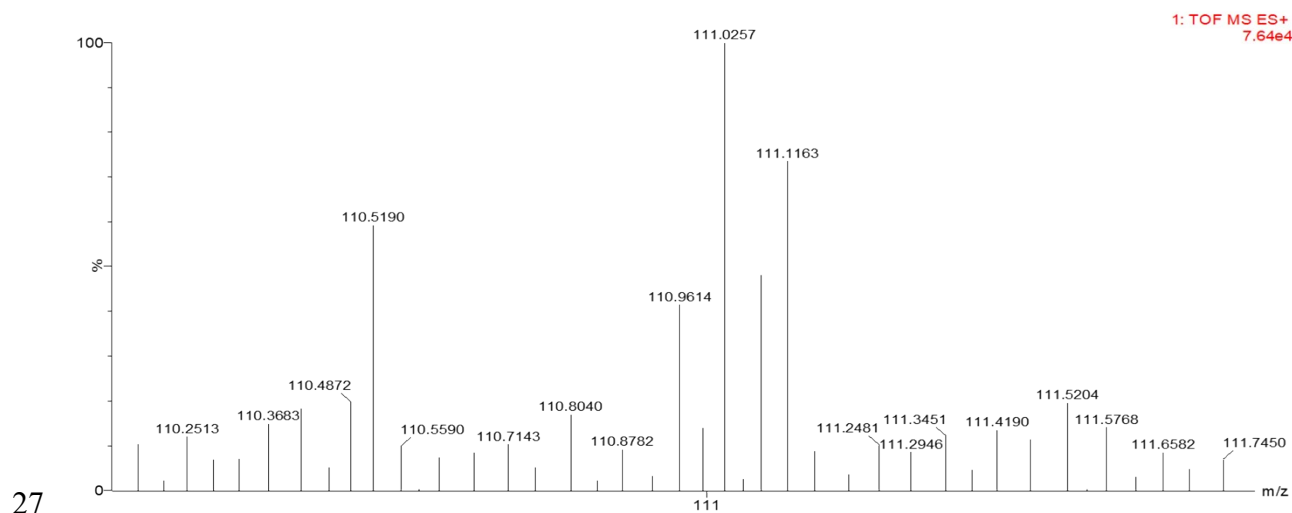

27  
28 **Fig. S2.** The HRMS spectrum of HS(Ph)<sub>1</sub>.

29

30 **4-Terphenylthiol (HS(Ph)<sub>3</sub>).** We synthesized 4-Terphenylthiol by the same procedure of

31 HS(Ph)<sub>1</sub>,<sup>1</sup> 4-bromo-p-terphenyl (3.09, 10.00 mmol), ethane-1,2-dithiol (1.00 mL 12.00 mmol),

32 KOH (2.80 g, 50.00 mmol) and CuSO<sub>4</sub>·5H<sub>2</sub>O (0.08 g, 5 mol%), were heated at 120 °C in DMF

33 (30.00 mL) under N<sub>2</sub> for 24 hours. The mixture was extracted three times with CH<sub>2</sub>Cl<sub>2</sub> (3 × 100

34 mL), washed with brine (3 × 100 mL) after cooling down to room temperature. The combined

35 organic phases were then dried over Na<sub>2</sub>SO<sub>4</sub>, filtered and concentrated under reduced pressure.

36 The product thiophenol (0.24 g, yield 9.0%) was then purified by column chromatography

37 (silica gel, CH<sub>2</sub>Cl<sub>2</sub>/petroleum ether = 1/2 v/v). <sup>1</sup>H NMR (400 MHz, Chloroform-*d*) δ 7.70 – 7.61

38 (m, 6H), 7.58 (d, *J* = 8.5 Hz, 2H), 7.46 (t, *J* = 7.6 Hz, 2H), 7.35 (d, *J* = 8.5 Hz, 3H). HRMS

39 (ESI<sup>+</sup>): *m/z* calc for C<sub>18</sub>H<sub>15</sub>S [M+H]<sup>+</sup> 263.089, found 263.089.

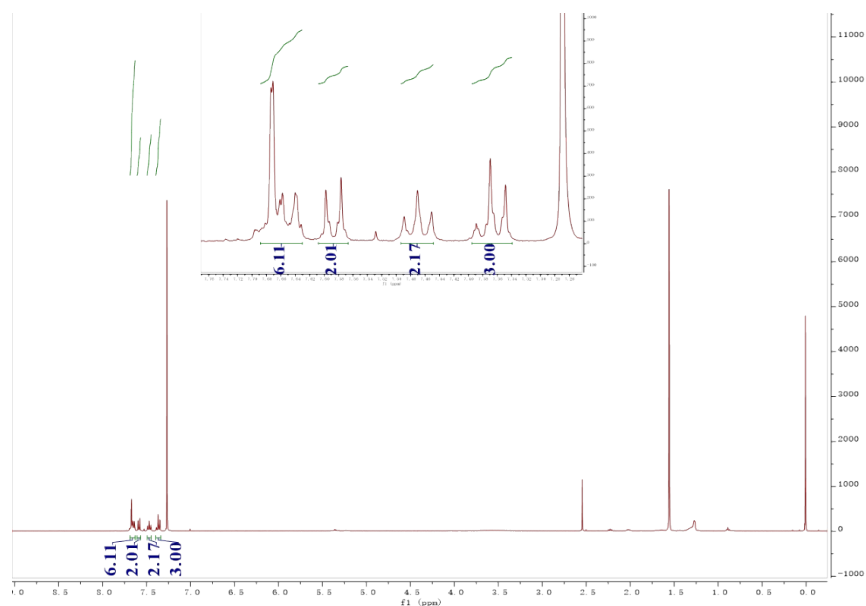

40

41 **Fig. S3.**  $^1\text{H}$  NMR spectrum for  $\text{HS}(\text{Ph})_3$  in  $\text{CDCl}_3$ .

42

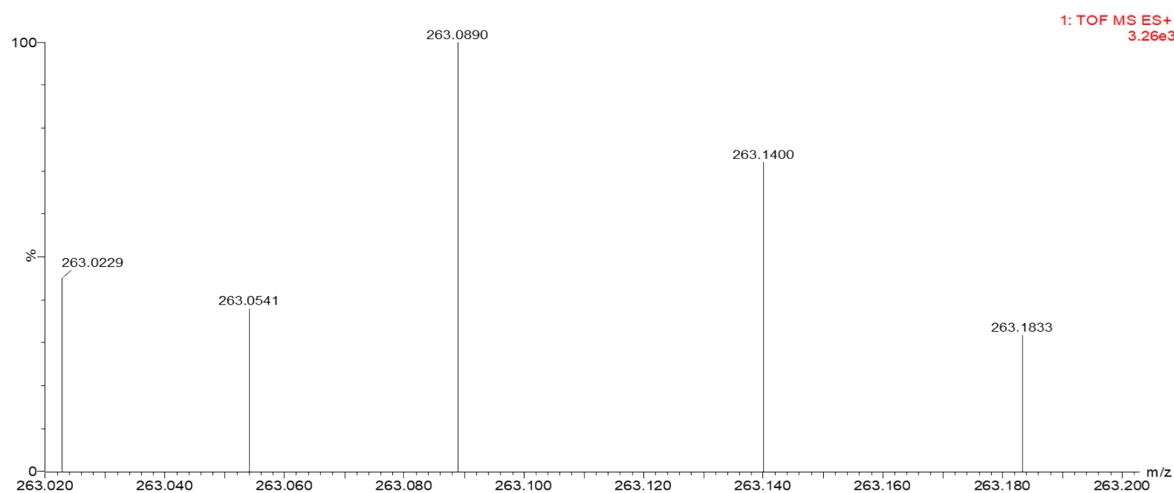

43

44 **Fig. S4.** The HRMS spectrum of  $\text{HS}(\text{Ph})_3$ .

45

## 46 **S2. Sample preparations.**

47 **Template-stripped Au surfaces ( $\text{Au}^{\text{TS}}$ ).**  $\text{Au}^{\text{TS}}$  substrates were prepared following procedures

48 reported previously.<sup>2</sup> Briefly, we deposited a 200 nm thick Au (Au with a purity of 99.999%

49 from Dimu Materials, Inc (China)) film on clean Si (100) wafers with a native  $\text{SiO}_2$  surface

50 layer by thermal deposition (KYKY-400, Zhongke Ke Yi, China) with the base pressure being

51  $2 \times 10^{-5}$  Pa and the evaporation rate was about  $0.2 \text{ \AA s}^{-1}$  for Au at the first 50 nm and then

52 increased to  $\sim 1 \text{ \AA s}^{-1}$  for the rest 150 nm. The glass slides ( $1.5 \times 1.5 \text{ cm}^2$ ) were ultrasonically  
53 cleaned with acetone and then ethanol for 20 minutes, and the slides were blown to dryness in  
54 a stream of  $\text{N}_2$  gas. After we cleaned the glass slides by a plasma of air for 5 mins at a pressure  
55 of 100 Pa, the glass slides were glued on the Au surfaces by photo-curable optical adhesive  
56 (Norland, No. 61). A 100 Watt UV lamp was used to cure the optical adhesive for 1 hour at a  
57 distance of 60 cm from the light source. The Au surface that had been in contact with the Si/SiO<sub>2</sub>  
58 wafer was lift-off by a razor blade.

59 **Direct deposition of Au (Au<sup>DE</sup>).** As described before,<sup>3</sup> the thermal evaporator was applied to  
60 deposit Au on the Si wafers under high vacuum ( $2 \times 10^{-5}$  mbar) and the deposition rate and film  
61 thickness were two significant parameters to determine the surface roughness, and the receipt  
62 we used for i) Au<sup>DE1</sup> (rms = 1.3 nm, a 5 nm layer of Cr at rate of  $0.1 \text{ \AA s}^{-1}$  followed by 200 nm  
63 of Au at a rate of  $1 \text{ \AA s}^{-1}$ ), ii) Au<sup>DE2</sup> (rms = 2.2 nm, a 20 nm layer of Cr at rate of  $1 \text{ \AA s}^{-1}$  followed  
64 by 200 nm of Au at a rate of  $5 \text{ \AA s}^{-1}$ ) and iii) Au<sup>DE3</sup> (rms = 3.2 nm, a 40 nm layer of Cr at rate  
65 of  $1 \text{ \AA s}^{-1}$  followed by 400 nm of Au at a rate of  $5 \text{ \AA s}^{-1}$ ). To eliminate surface contamination  
66 from the ambient, the Au<sup>DE</sup> surfaces removing from the vacuum chamber were immediately  
67 used to form SAMs.

68 **SAMs preparation.** All thiol terminated molecules except HS(Ph)<sub>1</sub> and HS(Ph)<sub>3</sub> were  
69 purchased from Sigma Aldrich with their highest purity (at least >98%) that we can found. To  
70 form SAMs, Au substrates were immersed in degassed 3 mM ethanolic solutions of HSC<sub>m</sub> (m  
71 = 4, 6, 8) and HS(Ph)<sub>n</sub> (n = 1, 2, 3) over a period of time of 3 h under an inert nitrogen  
72 environment. The SAMs were rinsed with ethanol (AR grade) to remove the physisorbed  
73 molecules, dried in a stream of dry nitrogen gently and used for experiments within minutes to  
74 avoid degradation of the S-Au bond and surface contaminations.

75

76

### 77 **S3. Sample Characterizations.**

78 **Atomic Force Microscope (AFM).** The AFM images were recorded by Bruker Dimension  
79 FastScan AFM with tapping mode tips (Dimension, resonant frequency: 1.4 MHz, force  
80 constant: 18 N m<sup>-1</sup>). We measured three 1 × 1 μm and three 5 × 5 μm images on three substrates  
81 for each type of surfaces. The AFM software NanoScope Analysis (version 1.8) was used to  
82 analyze the AFM images for topography and the rms roughness.

83 **X-ray Photoelectron Spectroscopy (XPS) Measurements.** XPS was used to characterize the  
84 SAMs of HSC<sub>m</sub> and HS(Ph)<sub>n</sub> with instruments located in National Center of Electron  
85 Spectroscopy in Beijing. The energy of the incident X-ray beam (1486.6 eV) was used with the  
86 Thermo Scientific K-Alpha XPS system. We recorded the high-resolution XPS spectra of S 2*p*,  
87 C 1*s* and Au 4*f*. In analysis, we used the least-square peak fit with a pseudo-Voigt function (a  
88 linear combination of Lorentzian (30%) and Gaussian (70%) functions)<sup>4</sup> to fit the XPS spectra  
89 with Avantage software, and the sloping background was modelled using a smart background  
90 correction.

91 The physical absorbed molecules with binding energy being about 161eV of S 2*p*  
92 spectrum<sup>5</sup> can be observed for HS(Ph)<sub>n</sub> (n = 1, 2, 3) anchored on Au<sup>DE</sup> electrode with rms  
93 roughness being 3.2nm (Fig. S24). In contrast, HSC<sub>m</sub>, based on S 2*p* spectrum (Fig. S26), were  
94 relatively densely assembled without physical absorbed molecules on rough Au substrate,  
95 indicating that the topography of bottom-electrode had more remarkable impacts on packing of  
96 conjugated molecules, the explanations of which was that HS(Ph)<sub>n</sub> SAMs anchored on rough  
97 bottom-electrode with extremely deteriorated packing and destroyed π-π interactions of  
98 HS(Ph)<sub>n</sub> for their more rigid nature.

99 **Ultraviolet Photoelectron Spectroscopy (UPS) Measurements.** Work functions (WF) and  
100 HOMO energy were detected by UPS function installed in the Thermo Scientific K-Alpha XPS  
101 system. A specially designed biasing stage, which is in electrical contact with the analyzer, was

102 applied to hold the samples. All measurements were performed in an ultrahigh vacuum chamber  
103 with a base pressure of  $1 \times 10^{-8}$  pa. To probe the valence band, the photon energy at 21.22 eV  
104 was used and  $-10$  V bias was applied to the sample to overcome the work function of the  
105 analyzer. All UPS spectra were referenced to the Fermi edge of Au.

106

#### 107 **S4. Electrical and thermoelectrical measurements.**

108 **Electrical Measurements and Analysis.** We followed previously reported procedures <sup>2</sup> to  
109 form the SAM-based junctions with cone-shaped tips of Ga<sub>2</sub>O<sub>3</sub>/EGaIn. The Au substrate was  
110 grounded and the top-electrode was biased from  $0\text{V} \rightarrow 0.5\text{ V} \rightarrow 0\text{V} \rightarrow -0.5\text{ V} \rightarrow 0\text{V}$ , with a  
111 step size of 50 mV, and a delay of 0.1 s, in all of our experiments. We measured three substrates  
112 to obtain  $\geq 20$  junctions, for each of which we collected 20-24  $J(V)$  traces (that is a total of  $\sim 480$   
113  $J(V)$  traces for each type of SAM). The  $J(V)$  data was analyzed following previously reported  
114 procedures. <sup>6</sup> Briefly, we plotted the histogram of  $\log|J|$  for each bias and fitted Gaussians to  
115 the histograms to obtain the log-mean ( $\mu_{\log}$ ) of the values of  $J$  and their log standard-deviations  
116 ( $\sigma_{\log}$ ).

117 **Analysis of relationship between measured  $\Delta V$  and  $S$ .** A polyimide (PI) film embedded with  
118 heating resistors is used to heating the Au electrode to generate temperature difference  
119 ( $\Delta T = 0\sim 8$  K) across the junctions (Fig. 1a, b). Firstly, control experiments were performed on  
120 clean Au surfaces with different surface roughness that were absent of molecules (Fig. S7, S9).  
121 We supposed that the temperature difference was mainly distributed across EGaIn and tungsten  
122 tip (W tip) because the thermal conductivity of EGaIn ( $G_{th, EGaIn} \sim 26.43\text{ W m}^{-1}\text{ K}^{-1}$ )<sup>7</sup> is far  
123 overweight that of the surrounding air ( $\sim 0.024\text{ W m}^{-1}\text{ K}^{-1}$ ). Wherein at Fig. S5, the difference  
124 between  $V_1$  and  $V_3$  represents the measured  $\Delta V$ ,  $T_1$  and  $T_3$  denote room temperature.  $V_2$  and  $T_2$   
125 are the potential and temperature measured by thermocouple of Au surface, respectively.

126 Therefore, the relationship between measured  $\Delta V$  and  $S$  for Au/EGaIn junctions can be generally  
 127 depicted as Equation. (S1-S4)

$$128 \quad S_{EGaIn} = -\frac{V_1 - V_2}{T_1 - T_2} \quad (S1)$$

$$129 \quad S_W = -\frac{V_3 - V_2}{T_1 - T_2} \quad (S2)$$

$$130 \quad V_1 - V_3 > 0, T_1 - T_2 < 0, S_{EGaIn} - S_W > 0 \quad (S3)$$

$$131 \quad S_{EGaIn} - S_W = -\frac{V_1 - V_2 - V_2 + V_2}{T_1 - T_2} = -\frac{V_1 - V_3}{T_1 - T_2} \quad (S4)$$

132 Fig. S21-S22 shows plot of  $\Delta V$  as a function of  $\Delta T$  for Au/EGaIn junctions with different  
 133 surface roughness. It can be found that the measured thermoelectric voltage is nearly  
 134 independent with the surface roughness of bottom electrode, according to  $S = -\frac{\Delta V}{\Delta T}$ , and the  
 135 obtained  $S$  is  $\sim 2.0 \mu\text{V K}^{-1}$ . Considering the thermopower of W tip ( $S_W$ ) is  $1.0 \mu\text{V K}^{-1}$ ,<sup>8</sup> and  
 136 hence, the thermopower of EGaIn ( $S_{EGaIn}$ ) is  $3.0 \mu\text{V K}^{-1}$ .

137

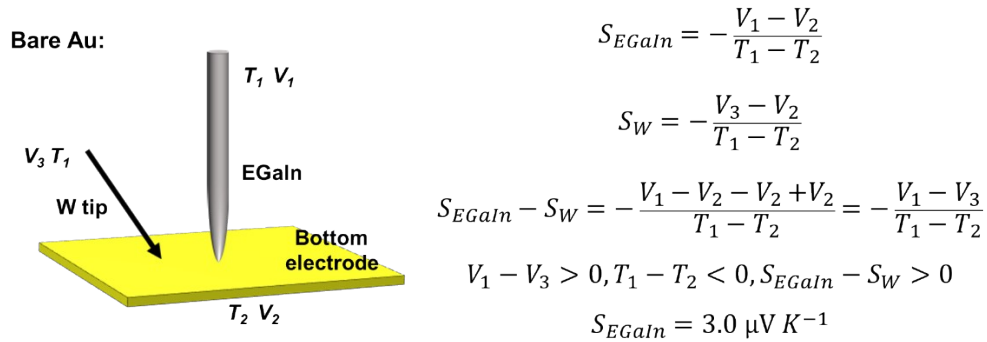

138

139 **Fig. S5.** Schematic diagram of the voltages and temperatures across bare Au/EGaIn junction.

140

141 In the case of SAMs anchoring on Au electrode (Fig. S6), we defined  $T_1, V_1$  and  $T_4, V_4$  were the  
 142 temperature (room temperature) and potential of Syringe and W tip away from SAMs,  
 143 respectively.  $T_2$  and  $V_2$  were the temperature measured by thermocouple potential of Syringe



144 close to SAMs.  $V_3$  and  $T_3$  are the potential and temperature of Au surface. Theoretically, the  
 145 temperature gradient was supposed to locate across SAMs because the thermal conductivity of  
 146 n-alkanethiolates ( $\sim 18 \text{ pW/K}$ )<sup>9</sup> was 3 orders of magnitude smaller than that of EGaIn  
 147 ( $\Delta T_1 = (T_1 - T_2) \gg \Delta T_2 = (T_2 - T_3)$ ), however, the measured  $T_2$  was higher than room temperature  
 148 and approximately half as  $T_3$  probably due to heat radiation ( $\Delta T = \Delta T_1 \approx \Delta T_2 = \frac{1}{2} \Delta T_3 = (T_1 - T_3)$ ).  
 149 Hence, the relationship between measured  $\Delta V$  and  $S$  for Au/SAM//Ga<sub>2</sub>O<sub>3</sub>/EGaIn junctions can  
 150 be generally depicted as Equation. (S5-S9)

$$151 \quad S_{EGaIn} = -\frac{V_1 - V_2}{T_1 - T_2} = -\frac{\Delta V_1}{\Delta T_1} \quad (S5)$$

$$152 \quad S_{SAM} = -\frac{V_2 - V_3}{T_2 - T_3} = -\frac{\Delta V_2}{\Delta T_2} \quad (S6)$$

$$153 \quad S_W = -\frac{V_4 - V_3}{T_4 - T_3} = -\frac{\Delta V_3}{\Delta T_3} \quad (S7)$$

$$154 \quad S_{EGaIn} + S_{SAM} - 2S_W = -\frac{V_1 - V_4}{\Delta T} \quad (S8)$$

$$155 \quad S_{SAM} = -\frac{V_1 - V_4}{\Delta T} - S_{EGaIn} + 2S_W = -\frac{V_1 - V_4}{\Delta T} - 1 \quad (S9)$$

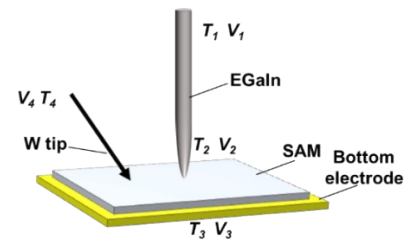

$T_2$ : temperature of EGaIn tip

$$G_{th,SAM} \approx 18 \text{ pW K}^{-1} \quad G_{th,EGaIn} \approx 26 \text{ W m}^{-1} \text{ K}^{-1}$$

$$G_{th,EGaIn} \approx 10^3 G_{th,SAM} \quad Q = G_{th,SAM} \Delta T_1 + G_{th,EGaIn} \Delta T_2$$

$$\Delta T_1 = (T_1 - T_2) \gg \Delta T_2 = (T_2 - T_3)$$

$$\text{Heat radiation: } \Delta T = \Delta T_1 \approx \Delta T_2 = \frac{1}{2} \Delta T_3 = (T_1 - T_3)$$

$$S_{EGaIn} = -\frac{V_1 - V_2}{T_1 - T_2} = -\frac{\Delta V_1}{\Delta T_1}$$

$$S_{SAM} = -\frac{V_2 - V_3}{T_2 - T_3} = -\frac{\Delta V_2}{\Delta T_2}$$

$$S_W = -\frac{V_4 - V_3}{T_4 - T_3} = -\frac{\Delta V_3}{\Delta T_3}$$

$$S_{EGaIn} + S_{SAM} - 2S_W = -\frac{V_1 - V_4}{\Delta T}$$

$$S_{SAM} = -\frac{V_1 - V_4}{\Delta T} - S_{EGaIn} + 2S_W$$

156  
 157 **Fig. S6.** Schematic diagram of the voltages and temperatures across Au/SAM//Ga<sub>2</sub>O<sub>3</sub>/EGaIn junction.  
 158

159 **Thermopower of commercial silicon wafer.** To verify that our platform can measure  
 160 thermopower precisely, we measured the Seebeck effects of commercial silicon wafer by EGaIn

161 top-contacts, including P-type and N-type and the results are shown in Fig. S7-S8. It is evidence  
 162 that the thermoelectric voltage is positively-changed for P-type Si supporting holes transport  
 163 once heating bottom electrode, and negatively-changed for N-type Si owing to charge transport  
 164 being dominated by electrons. The measured values of  $S$  for N-type and P-type Si are  $309.3 \pm$   
 165  $7.8 \mu\text{V K}^{-1}$  and  $-286.3 \pm 26.3 \mu\text{V K}^{-1}$ , respectively, similar to the reported values.<sup>10</sup> The sign  
 166 of  $S$  were determined by the nature of charge carriers with either electrons or holes. Fig. S8f  
 167 shows schematic diagram of thermoelectric test of Si, where a copper wire was attached to the  
 168 bottom surface of silicon wafer, ensuring that the carriers mainly migrate along the longitudinal  
 169 direction during test.

170

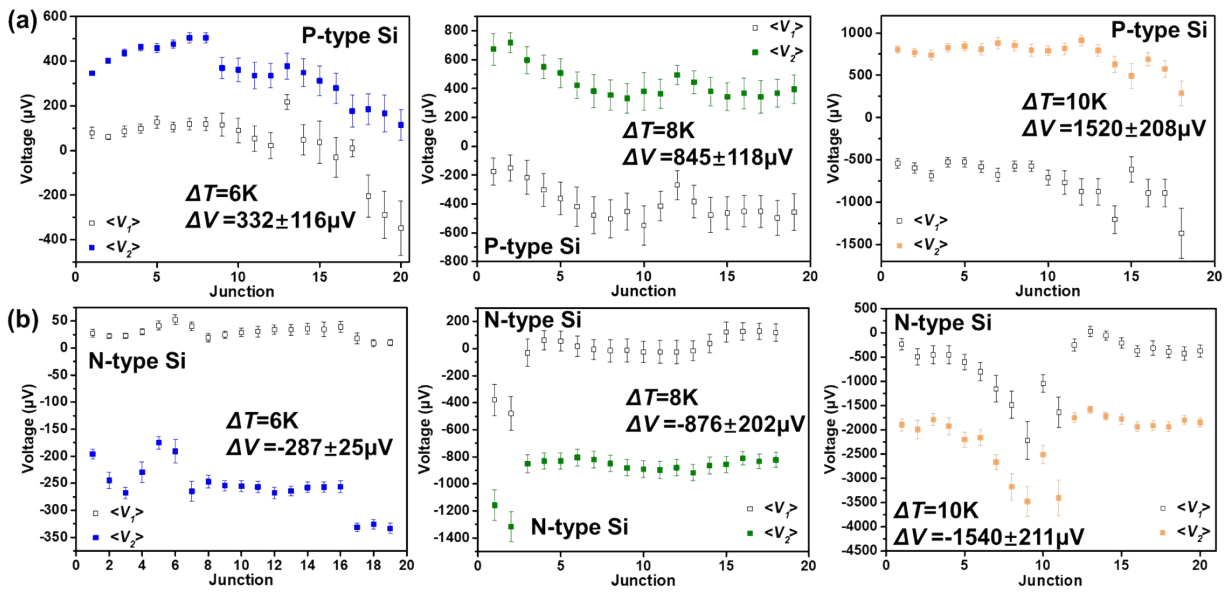

171

172 Fig. S7. Thermoelectric potential of Si//Ga<sub>2</sub>O<sub>3</sub>/EGaIn.

173

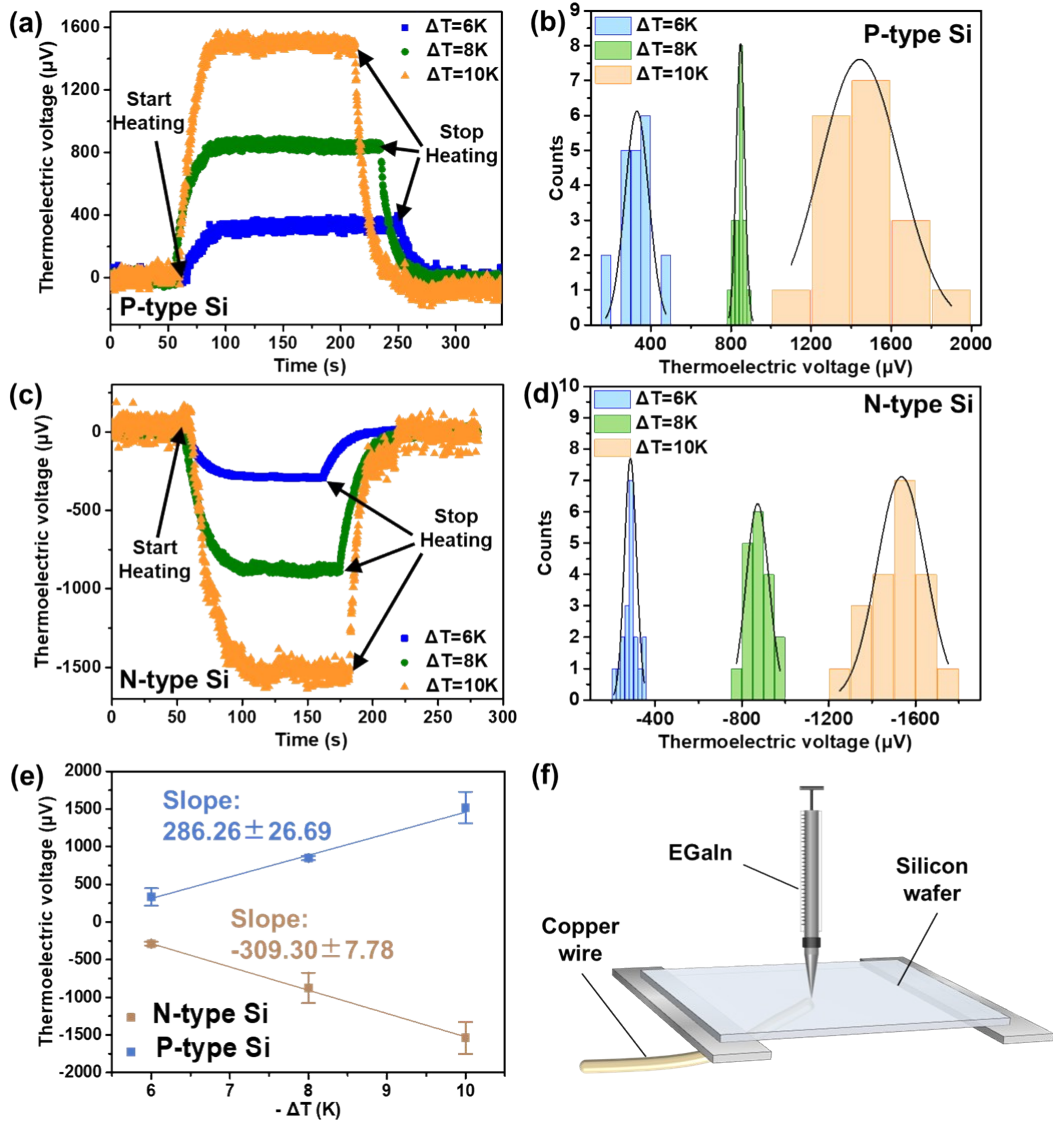

174

175 **Fig. S8.** Thermoelectric potential of Cu//Si//Ga<sub>2</sub>O<sub>3</sub>/EGaIn junction at different  $\Delta T$  for P-type Si (a) and N-type Si  
 176 (c), (b, d) corresponding histograms of  $\Delta V$  with a Gaussian fit to these histograms, (e) plot of  $\Delta V$  as a function of  
 177  $\Delta T$  for of N-type and P-type Si, (f) Schematic diagram of thermoelectric test of Si, where a copper wire was  
 178 attached to the bottom surface of the wafer.  
 179

180 **The measurement accuracy and error analyses for Seebeck coefficient.** The accuracy of our  
 181 thermal voltage measurement includes two parts: i) the accuracy of the output voltage and ii)  
 182 the accuracy of the input temperature. Firstly, Fig. S9 shows the accurate voltage measurement  
 183 was obtained by the voltmeter (2182A Nanovoltmeter, Keithley Inc., USA) with a detection  
 184 limit of  $0.001\mu\text{V}$ . Considering the loss at the electrical circuit (mainly at the connection points),  
 185 so we take the significant digit of the thermovoltage in this work as  $0.01\mu\text{V}$ .

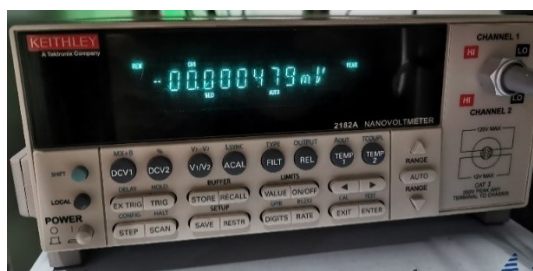

186

187 **Fig. S9.** The voltmeter (2182A NANOVOLTMETER, KEITHLEY Inc., America) we utilized to measure  
 188 the voltage with accurate measurement of  $0.001\mu\text{V}$ .

189

190 Secondly, the input temperature was monitored by a thermal couple with a detection limit of  
 191  $0.01\text{K}$ . Therefore, we estimate the accurate significant digit of temperature was  $0.1\text{K}$  in this  
 192 study. Typical temperature-time trace is shown in Fig. S10. Wherein,  $T_1$  is the room  
 193 temperature, the average of  $T_1$  ( $\langle T_1 \rangle$ ) and its standard deviation could be obtained over  $\sim 100$  s  
 194 test duration with a Gaussian fit. Once we heated the bottom-electrode,  $\Delta T$  occurred. When  
 195 reaching thermal equilibrium, the average of  $T_2$  ( $\langle T_2 \rangle$ ) and its standard deviation could be  
 196 obtained over  $\sim 200$  s test time with a Gaussian fit. Then  $\Delta T$  was obtained by using  $\langle T_2 \rangle$   
 197 subtracting  $\langle T_1 \rangle$ . We recorded at least 20 junctions to generate a histogram of  $\Delta T$  that can be  
 198 fitted with Gaussians to determine the mean value of  $\Delta T$  ( $\langle \Delta T \rangle$ ) and the corresponded standard-  
 199 deviation, as shown in Fig. S10c. Hence, the error of  $\Delta T$  is  $0.1\text{K}$ , accounting for  $\sim 2.5\%$ . Since  
 200 the error of  $S$  originated from  $\Delta V$  and  $\Delta T$ , that of the former ( $\sigma_{\Delta V}$ ) can be obtained from the  
 201 results of linear fitting in Fig. 3 and the latter ( $\sigma_{\Delta T}$ ) can be calculated from Fig. S10.

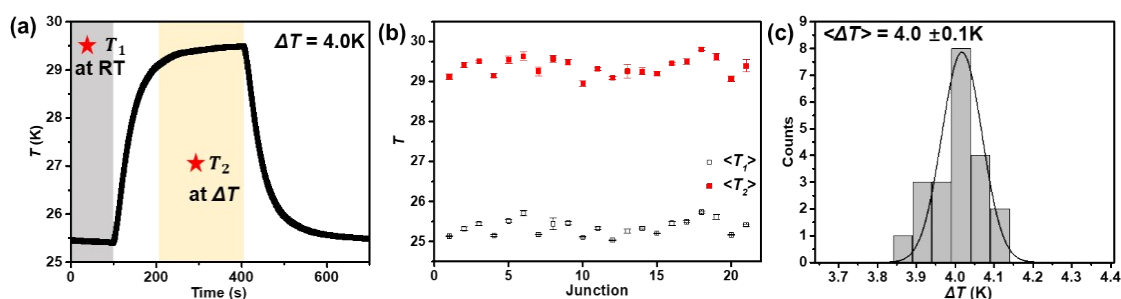

202

203 **Fig. S10.** (a) Temperature-time trace, (b) the related plot of  $\Delta T$  against number of junctions, (c) the

204 corresponded plot of histograms of  $\langle \Delta T \rangle$  (the mean value of  $\Delta T$ ) over 20 junctions with a Gaussian fit.

205 **Determination of power factor (PF).** We determined PF of HSC<sub>m</sub> (m = 1, 2, 3) and HS(Ph)<sub>n</sub>  
206 (n = 1, 2, 3) according to a procedure reported in the literature.<sup>11</sup> The magnitude of electric field  
207 intensity (*E*) can be given by:

$$E = \frac{V}{d} (GV m^{-1}) \quad (S10)$$

208 where *V* is the applied voltage and *d* is the molecular length considering the tilt angle (30°) of  
209 SAMs. The conductivity ( $\sigma$ ) is the inverse of resistivity, and can be obtained as follows:

$$\sigma = \frac{J}{E} (\mu S cm^{-1}) \quad (S11)$$

212 *J* (A cm<sup>-2</sup>) is the current density. Using the calculated  $\sigma$  value and the measured *S*, the power  
213 factor (PF) value was obtained according to the following relationship:

$$PF = S^2 \sigma (\mu W K^{-2} m^{-1}) \quad (S12)$$

215 It can be found that, based on UPS characterization (Table S1-S7), the location of HOMO  
216 ( $E_{HOMO}$ ) and energy offset ( $\delta E$ ) were changed insignificantly for SAMs of HSC<sub>m</sub> and HS(Ph)<sub>n</sub>  
217 with similar *l*, indicating the coincidence of corresponded electronic structure. Then, *S* and *G*  
218 were lie on molecular length. HS(Ph)<sub>1</sub> with the smaller *l* (Table S8), possessed higher *G* than  
219 that of HSC<sub>4</sub>, and theoretically larger PF. However, the physical absorbed molecules with  
220 binding energy being ~161eV of S 2*p* spectrum can be observed for HS(Ph)<sub>1</sub> anchored on Au  
221 electrode (Fig. S24). In contrast, HSC<sub>4</sub>, based on S 2*p* spectrum (Fig. S26), were relatively  
222 densely assembled without physical absorbed molecules on Au<sup>TS</sup> substrate. And the more rigid  
223 nature of HS(Ph)<sub>1</sub> could deteriorate SAMs packing, leading to the reduced number of molecules  
224 participating electron tunneling and lower *S*. In this case, the value of PF was dominated by *S*  
225 for HS(Ph)<sub>1</sub> and HSC<sub>4</sub>. In contrast, the *l* of HS(Ph)<sub>2</sub> and HS(Ph)<sub>3</sub> were larger than that of HSC<sub>6</sub>  
226 and HSC<sub>8</sub>, respectively. In this case, PF of SAMs assembled on Au<sup>TS</sup> electrode was mainly  
227 depended on *G*. Increased molecular length contributed to the enhanced electron tunneling  
228 distance and decreased *G* and inferior PF. Therefore, we qualitatively explain, from the

229 perspective of electron tunneling and molecular packing, that the PF of HSC<sub>m</sub> was larger than  
 230 that of similar molecular-length HS(Ph)<sub>n</sub> by combining XPS and UPS result.

231

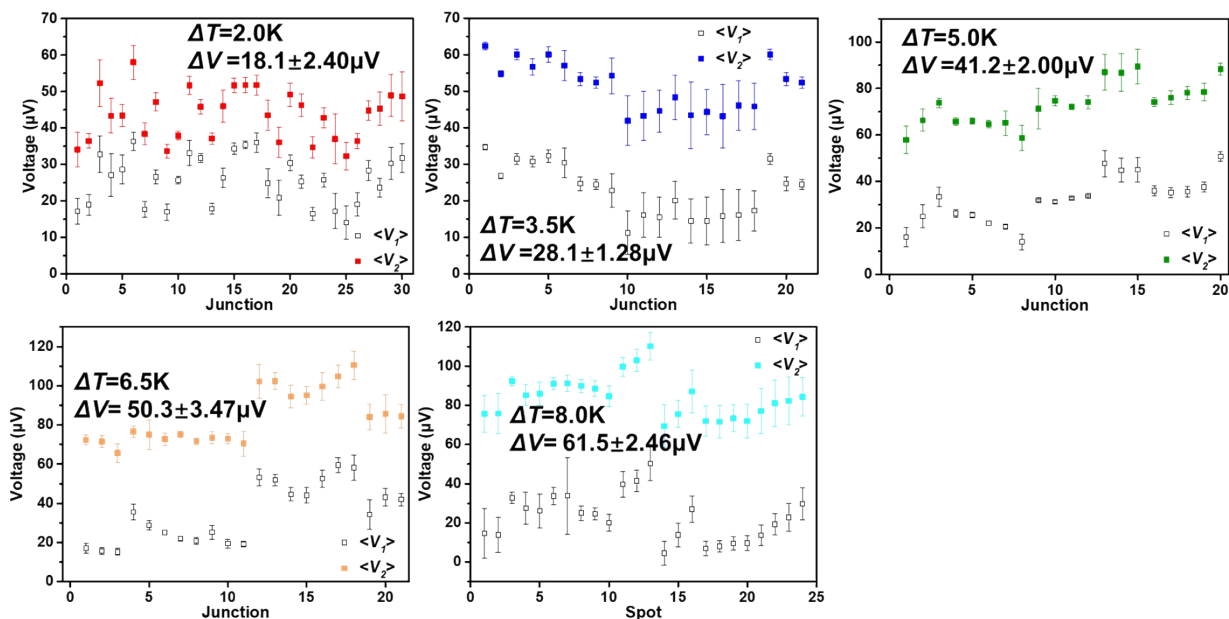

232

233 **Fig. S11.** The potential change of Au-S(Ph)<sub>2</sub>//Ga<sub>2</sub>O<sub>3</sub>/EGaIn junctions for each spot with surface roughness  
 234 of Au electrode being 0.37 nm.

235

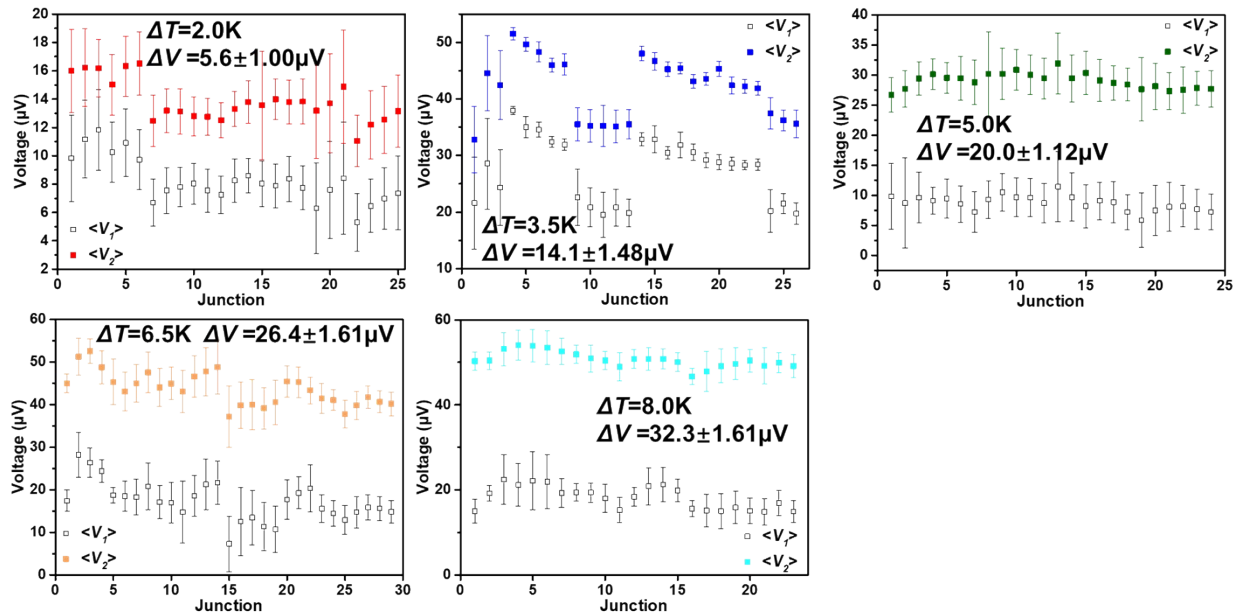

236

237 **Fig. S12.** The potential change of Au-S(Ph)<sub>2</sub>//Ga<sub>2</sub>O<sub>3</sub>/EGaIn junctions for each spot with surface roughness  
 238 of Au electrode being 1.30 nm.

239

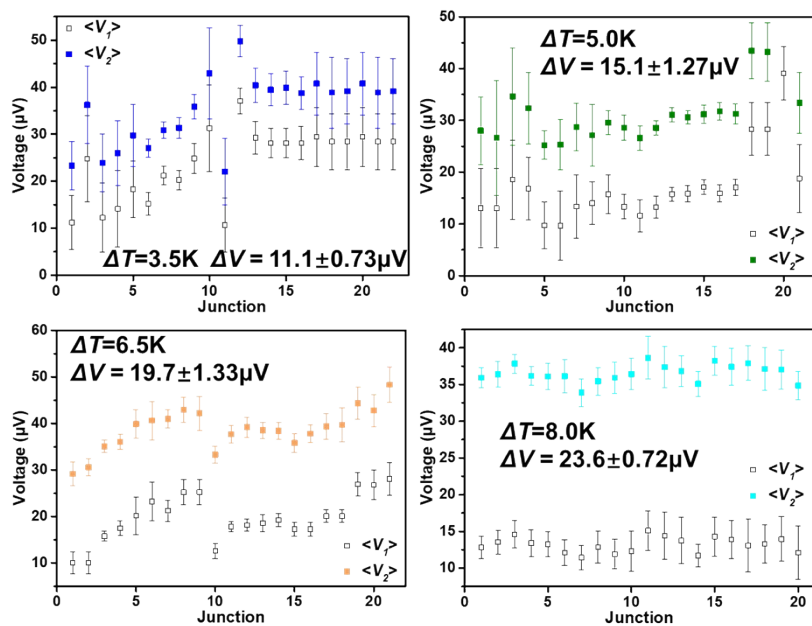

240

241 **Fig. S13.** The potential change of Au-S(Ph)<sub>2</sub>//Ga<sub>2</sub>O<sub>3</sub>/EGaIn junctions for each spot with surface roughness  
 242 of Au electrode being 2.20 nm.

243

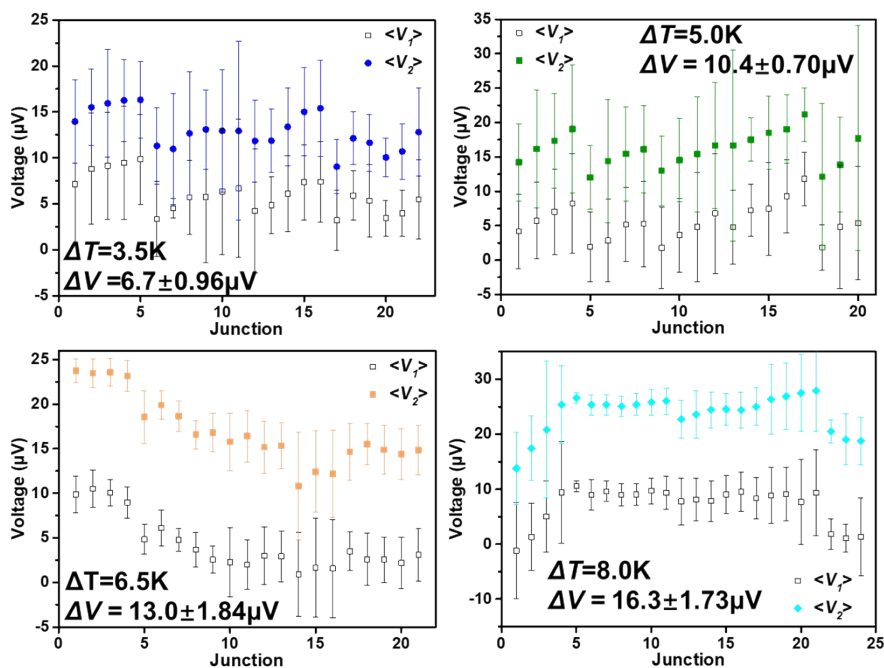

244

245 **Fig. S14.** The potential change of Au-S(Ph)<sub>2</sub>//Ga<sub>2</sub>O<sub>3</sub>/EGaIn junctions for each spot with surface roughness  
 246 of Au electrode being 3.20 nm.

247

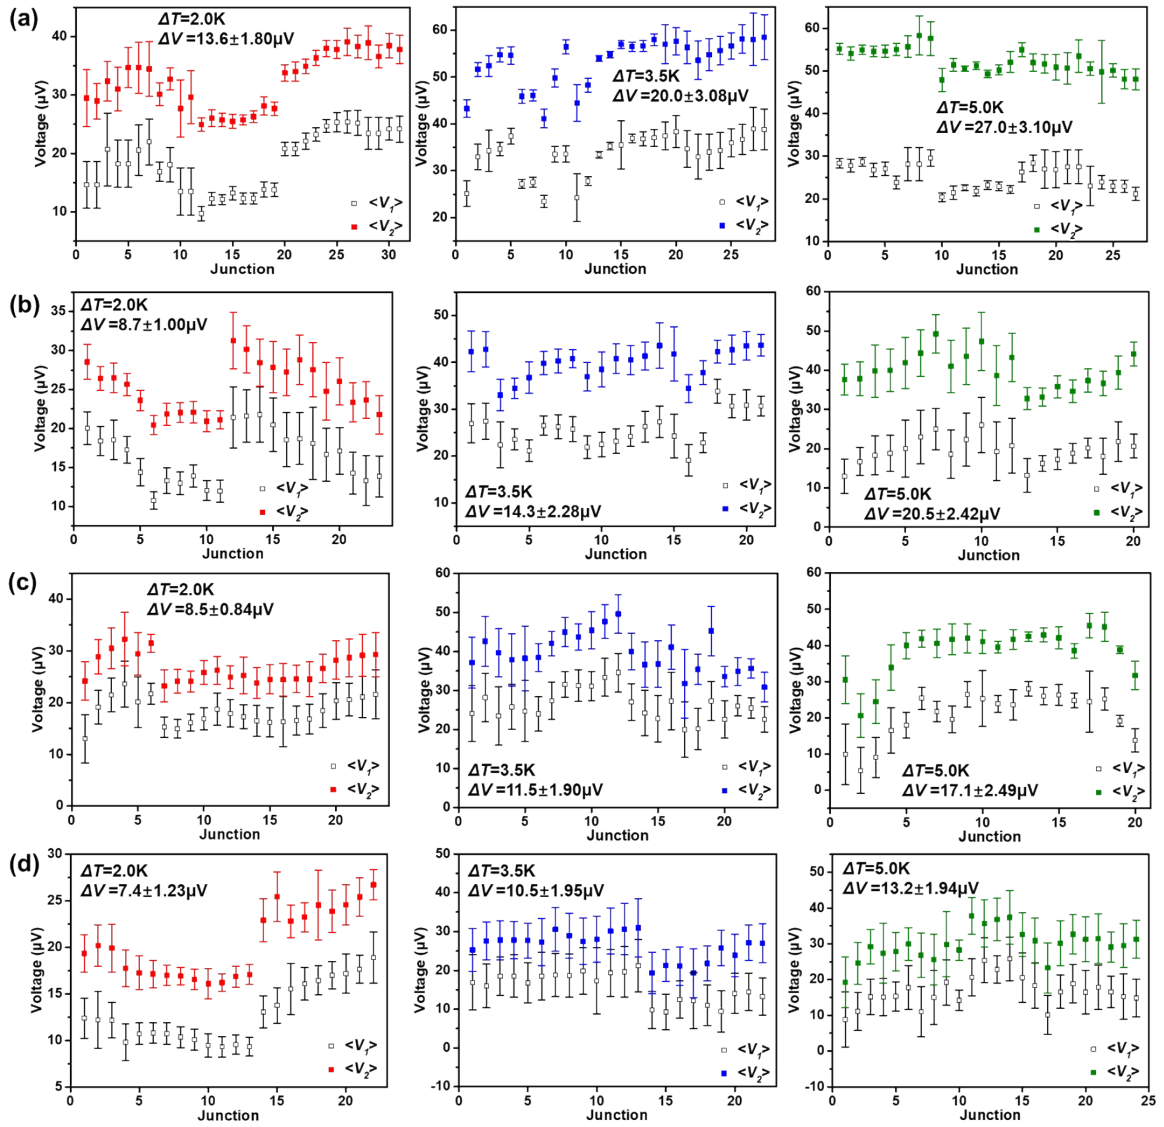

248  
 249  
 250  
 251  
 252

**Fig. S15.** The potential change of Au-S(Ph)<sub>1</sub>/Ga<sub>2</sub>O<sub>3</sub>/EGaIn junctions for each spot with surface roughness of Au electrode being (a) 0.37 nm, (b) 1.30 nm, (c) 2.20 nm and (d) 3.20 nm.



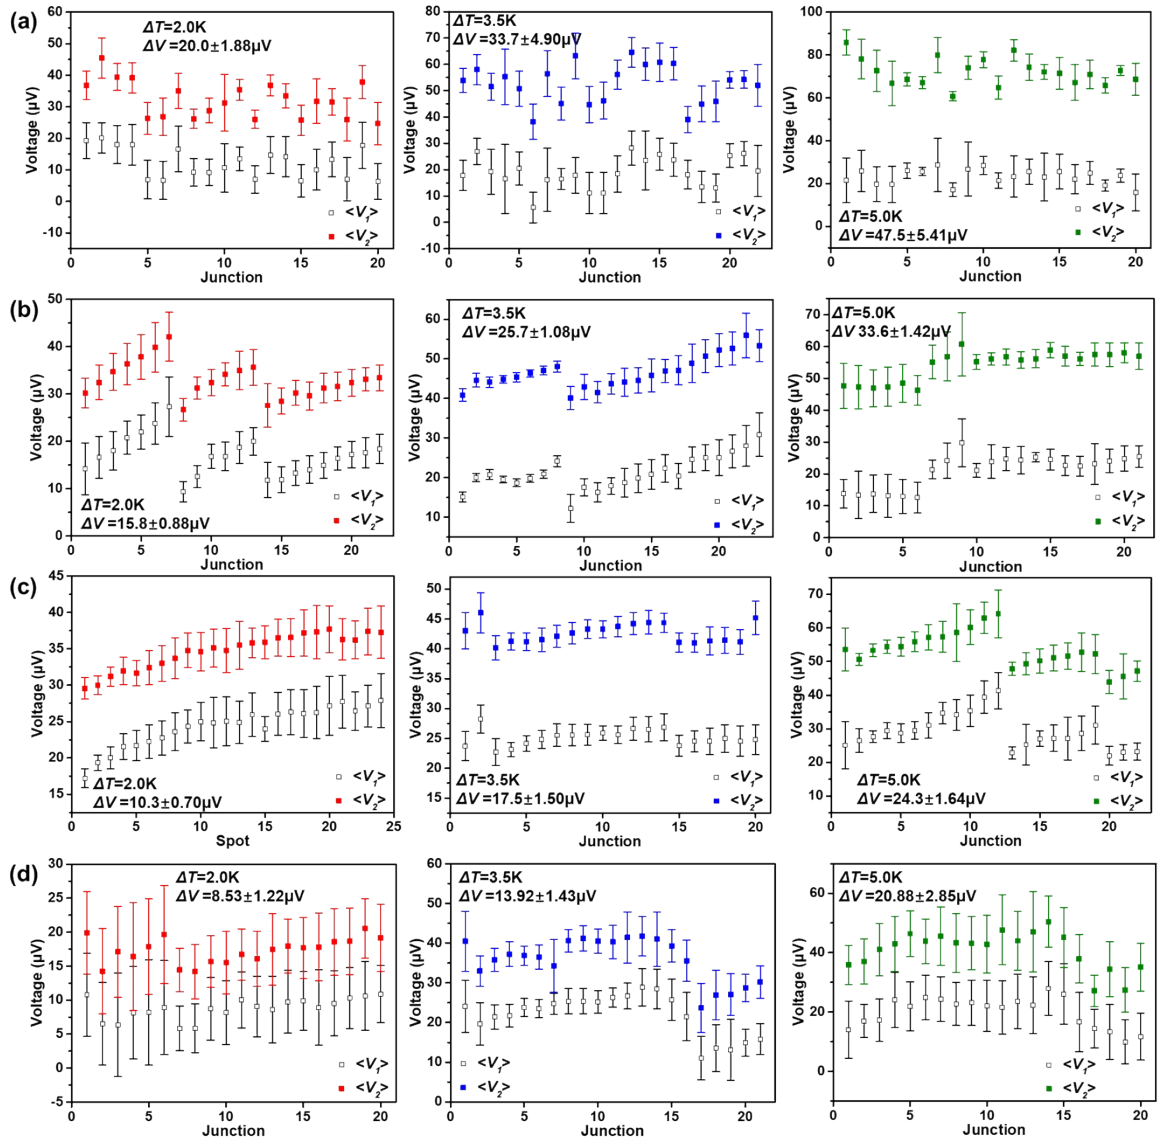

253  
 254 **Fig. S16.** The potential change of Au-S(Ph)<sub>3</sub>//Ga<sub>2</sub>O<sub>3</sub>/EGaIn junctions for each spot with surface roughness  
 255 of Au electrode being (a) 0.37 nm, (b) 1.30 nm, (c) 2.20 nm and (d) 3.20 nm .  
 256

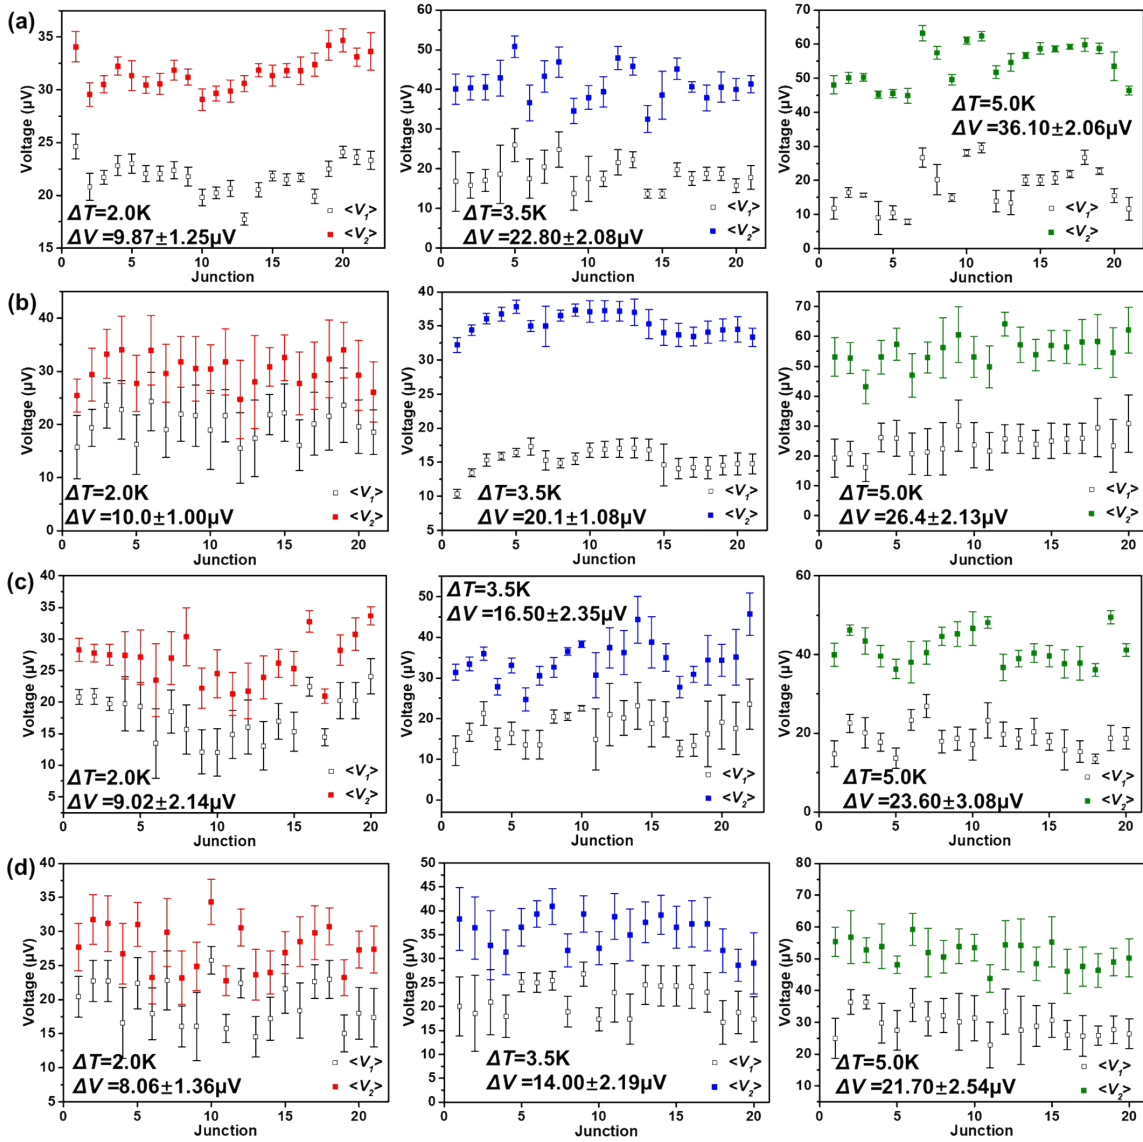

257  
258  
259  
260

**Fig. S17.** The potential change of Au-SC<sub>4</sub>//Ga<sub>2</sub>O<sub>3</sub>/EGaIn junctions for each spot with surface roughness of Au electrode being (a) 0.37 nm, (b) 1.30 nm, (c) 2.20 nm and (d) 3.20 nm .

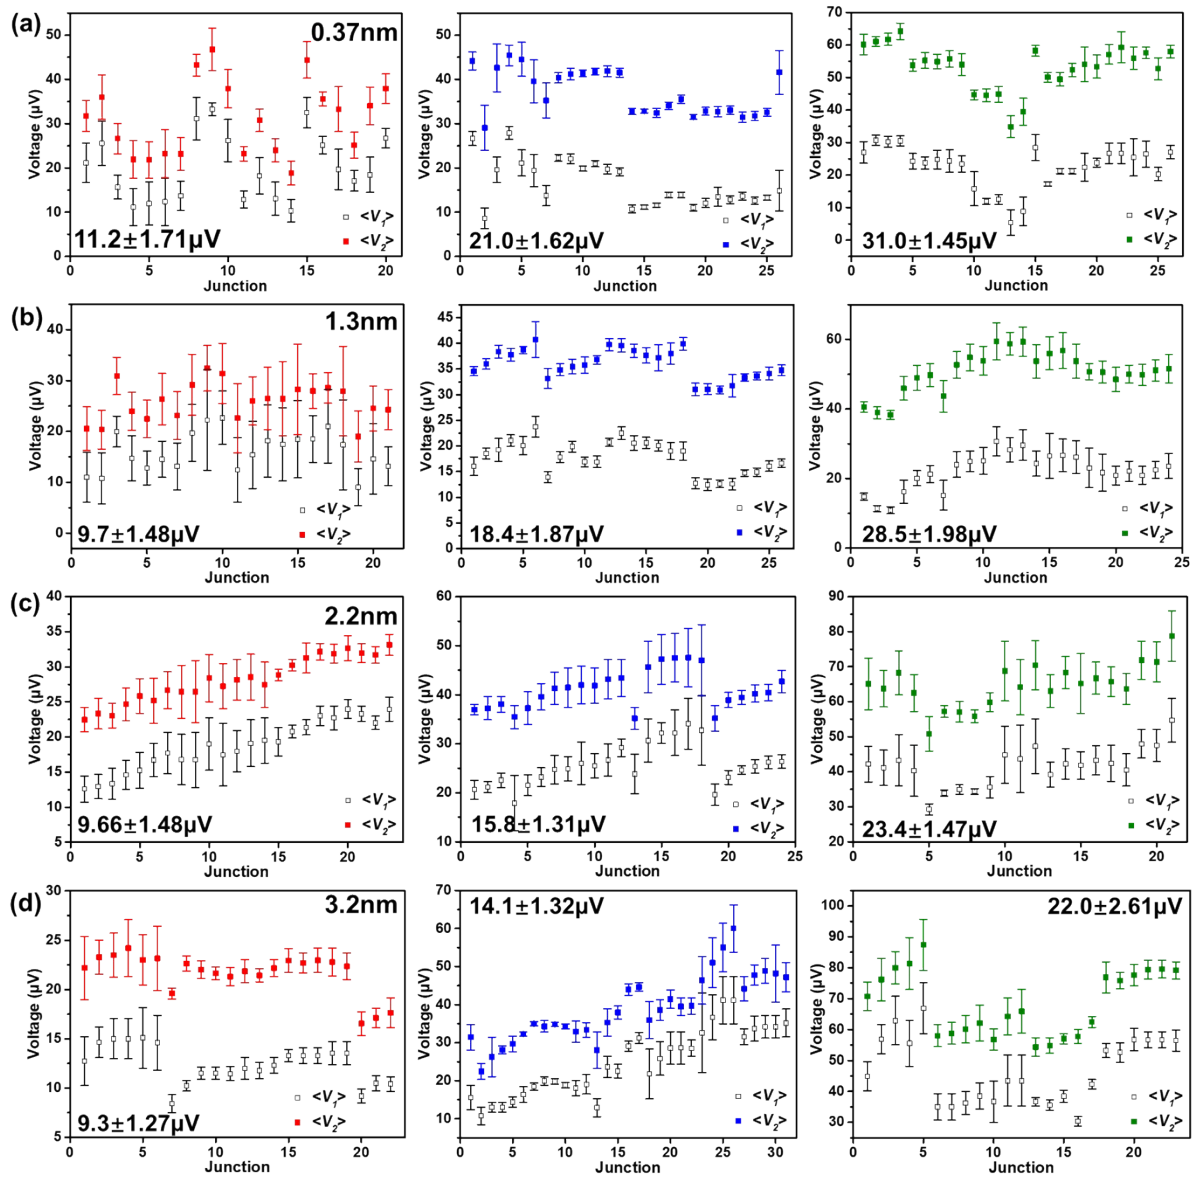

261  
262  
263  
264

**Fig. S18.** The potential change of Au-SC<sub>6</sub>//Ga<sub>2</sub>O<sub>3</sub>/EGaIn junctions for each spot with surface roughness of Au electrode being (a) 0.37 nm, (b) 1.30 nm, (c) 2.20 nm and (d) 3.20 nm.

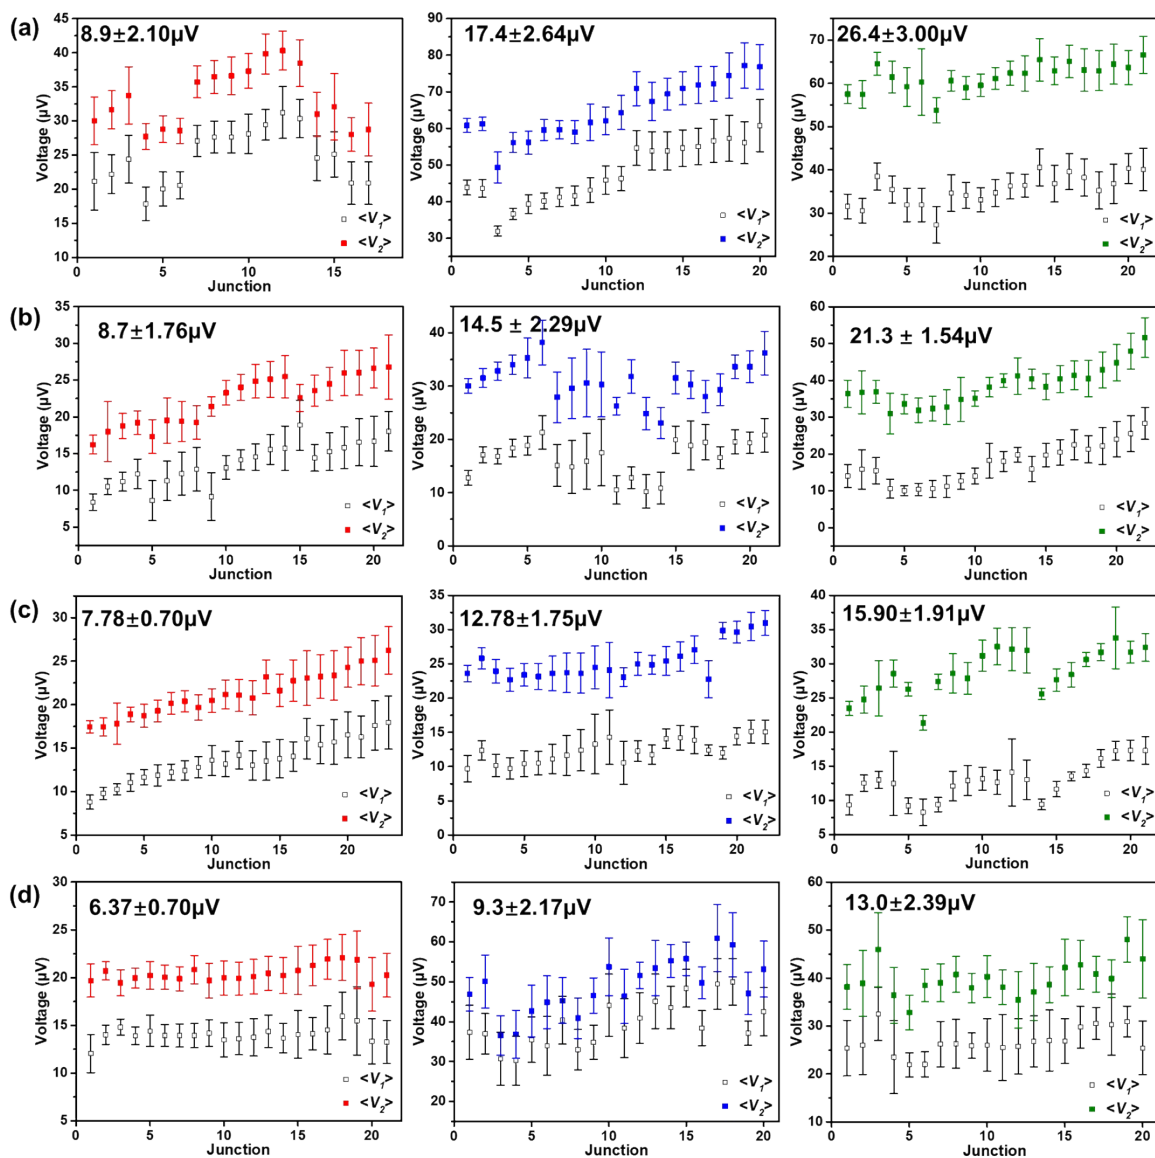

265  
 266 **Fig. S19.** The potential change of Au-SC<sub>8</sub>//Ga<sub>2</sub>O<sub>3</sub>/EGaIn junctions for each spot with surface roughness of  
 267 Au electrode being (a) 0.37 nm, (b) 1.30 nm, (c) 2.20 nm and (d) 3.20 nm.  
 268  
 269

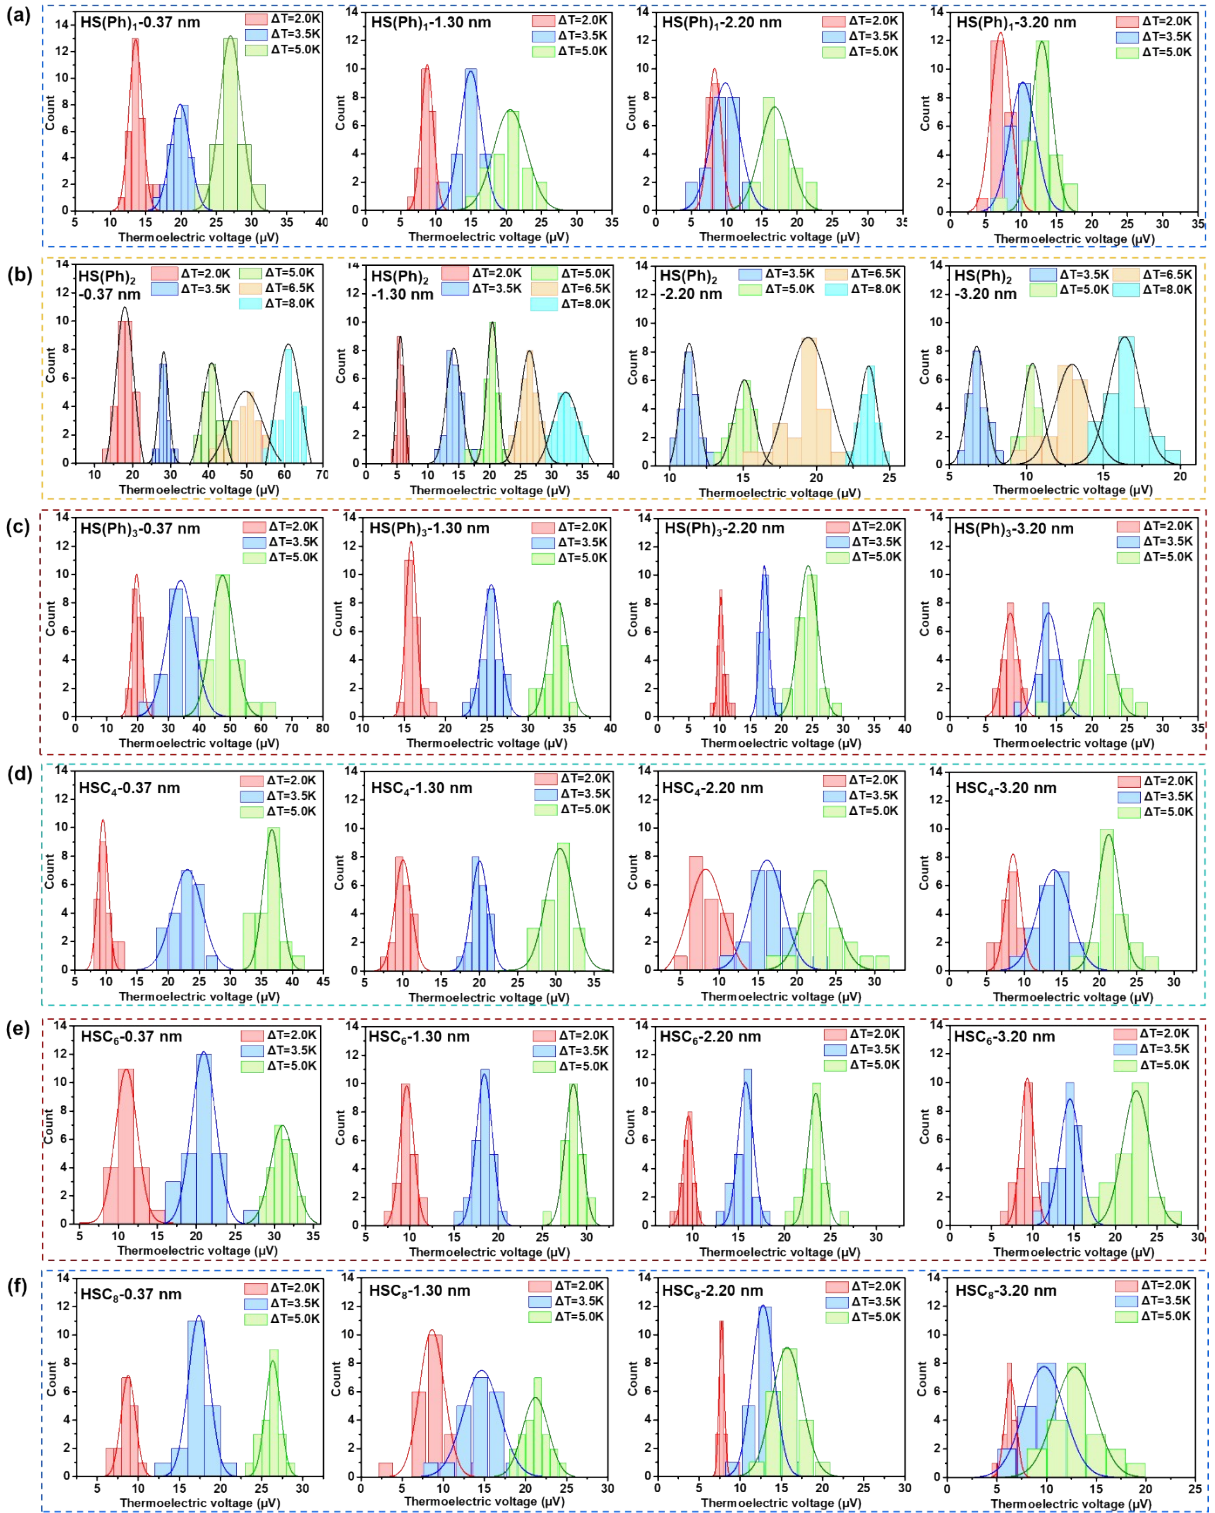

270  
271  
272  
273  
274

**Fig. S20.** The  $\Delta V$  at each applied  $\Delta T$  and the corresponding histograms of  $\Delta V$  with a Gaussian fit to these histograms of Au-S(Ph)<sub>n</sub>/Ga<sub>2</sub>O<sub>3</sub>/EGaIn and Au-C<sub>n</sub>/Ga<sub>2</sub>O<sub>3</sub>/EGaIn with different surface roughness, including rms = 0.37 nm, rms = 1.30 nm, rms = 2.20 nm and rms = 3.20 nm.

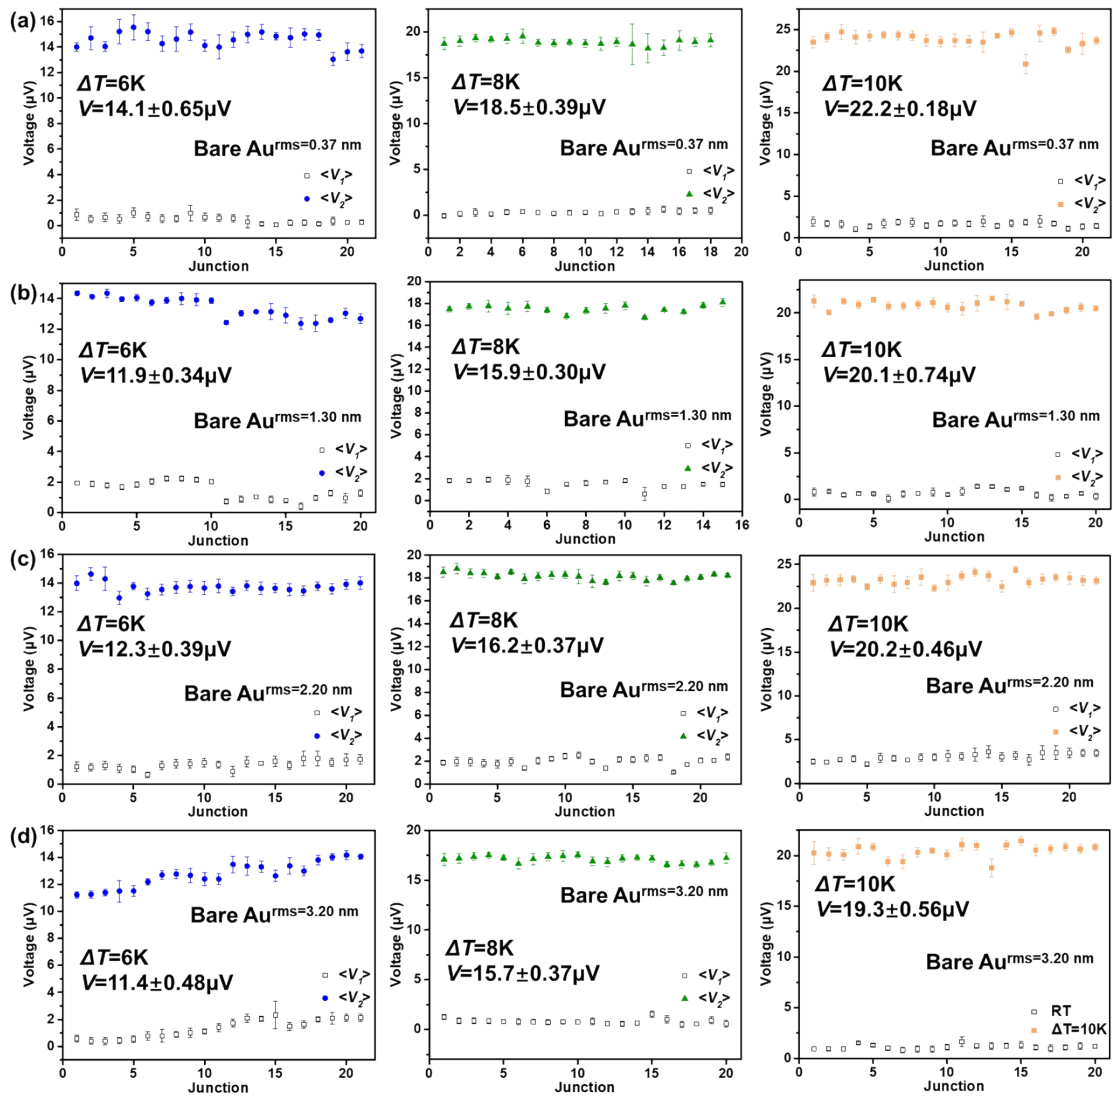

275

276 **Fig. S21.** The potential change of Au/EGaIn junction for each spot with different surface roughness, (a) rms  
 277 = 0.37 nm, (b) rms = 1.30 nm, (c) rms = 2.20 nm and (d) rms = 3.20 nm.

278

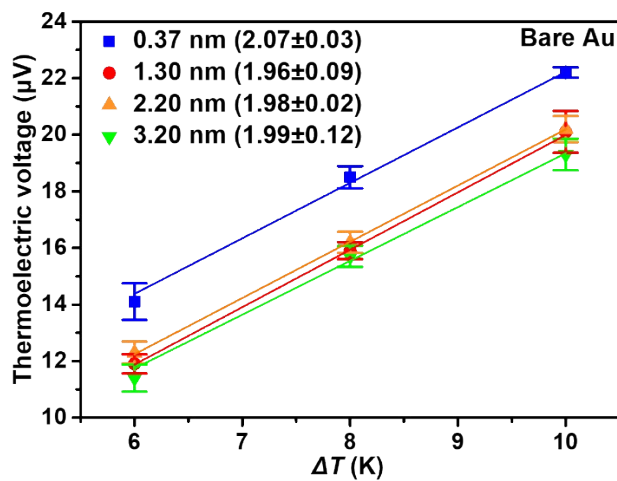

279

280 **Fig. S22.** Plot of  $\Delta V$  as a function of  $\Delta T$  of Au/EGaIn junctions with different surface roughness. The solid lines  
 281 are the linear fit.

282

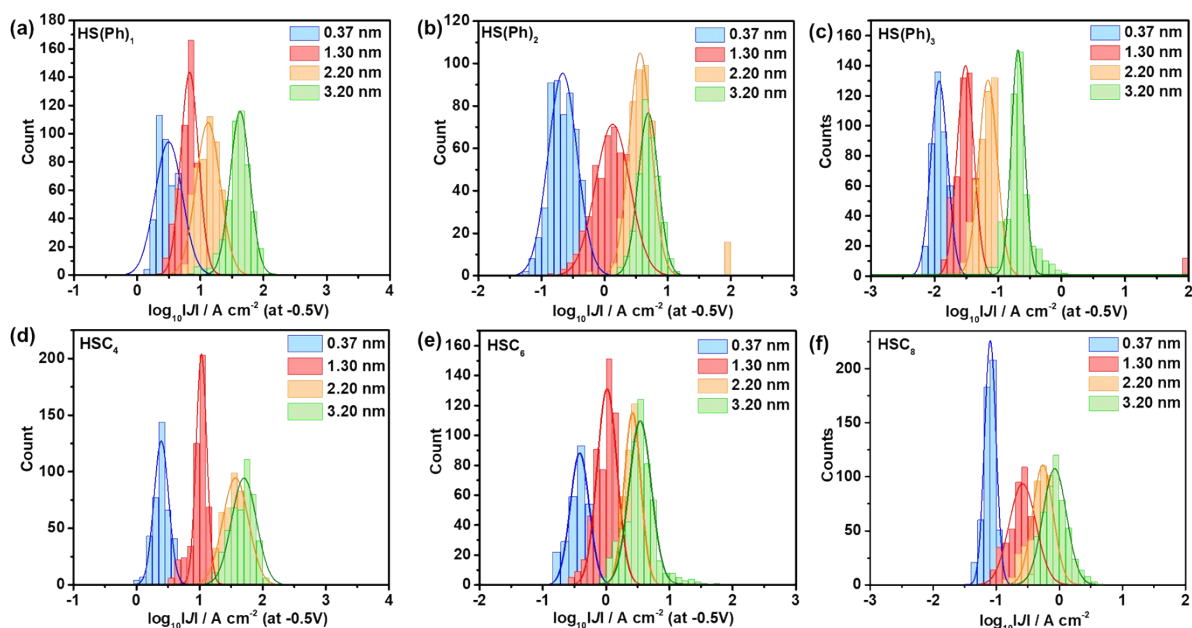

283

284 **Fig. S23.** The histograms of  $\log_{10}|J|$  at -0.5V with Gaussian fits for Au- S(Ph)<sub>2</sub>//Ga<sub>2</sub>O<sub>3</sub>/EGaIn, where rms =  
 285 0.37 nm, 1.30 nm, 2.20 nm, 3.20 nm.

286

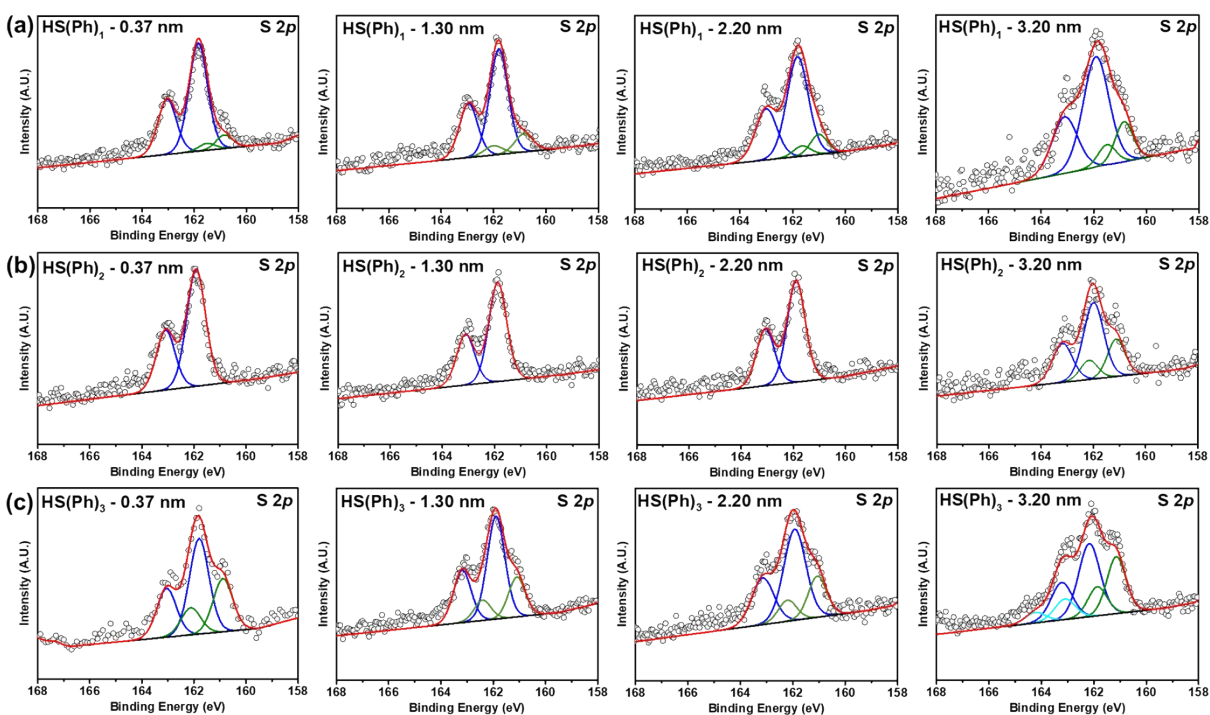

287

288 **Fig. S24.** The high resolution XPS S 2p spectra for Au-S(Ph)<sub>n</sub> (n = 1, 2, 3) with different surface roughness,  
 289 including rms = 0.37 nm, 1.30 nm, 2.20 nm, 3.20 nm.

290

291

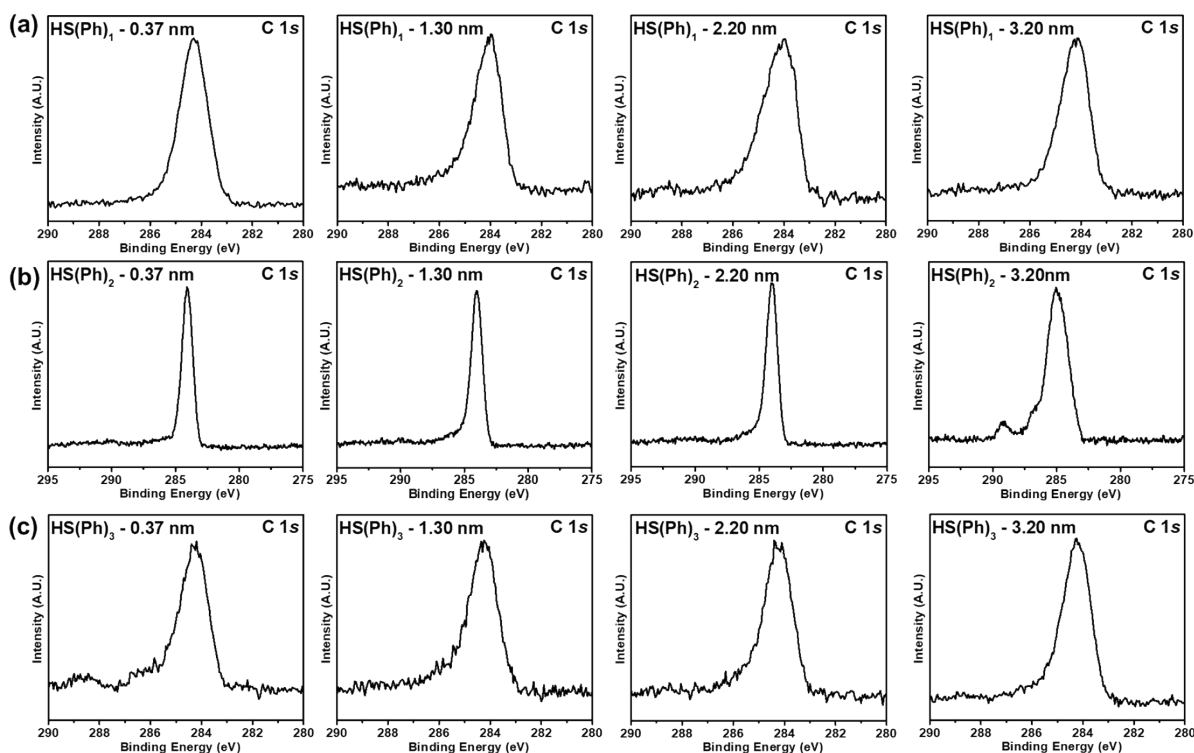

292

293 **Fig. S25.** The high resolution XPS C 1s spectra for Au-S(Ph)<sub>n</sub> (n = 1, 2, 3) with different surface roughness,  
 294 including rms = 0.37 nm, 1.30 nm, 2.20 nm, 3.20 nm.

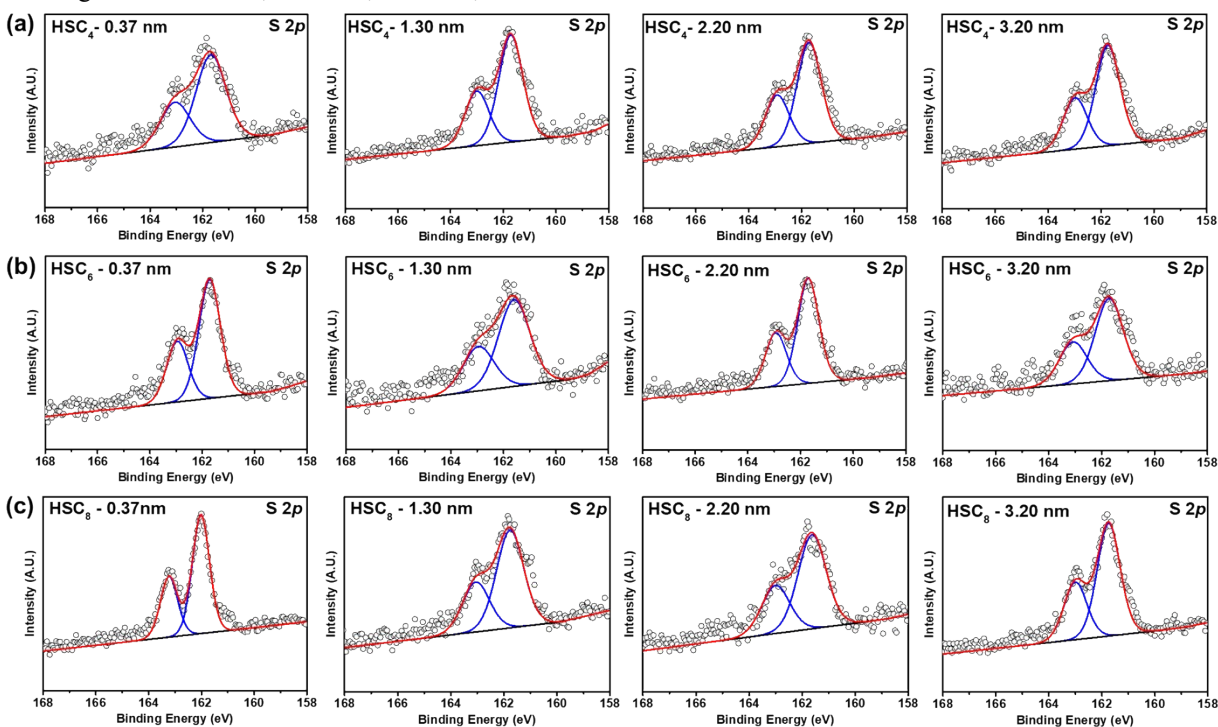

295

296 **Fig. S26.** The high resolution XPS S 2p spectra for Au-SC<sub>m</sub> (m = 4, 6, 8) with different surface roughness,  
 297 including rms = 0.37 nm, 1.30 nm, 2.20 nm, 3.20 nm.

298

299

300

301

302



303

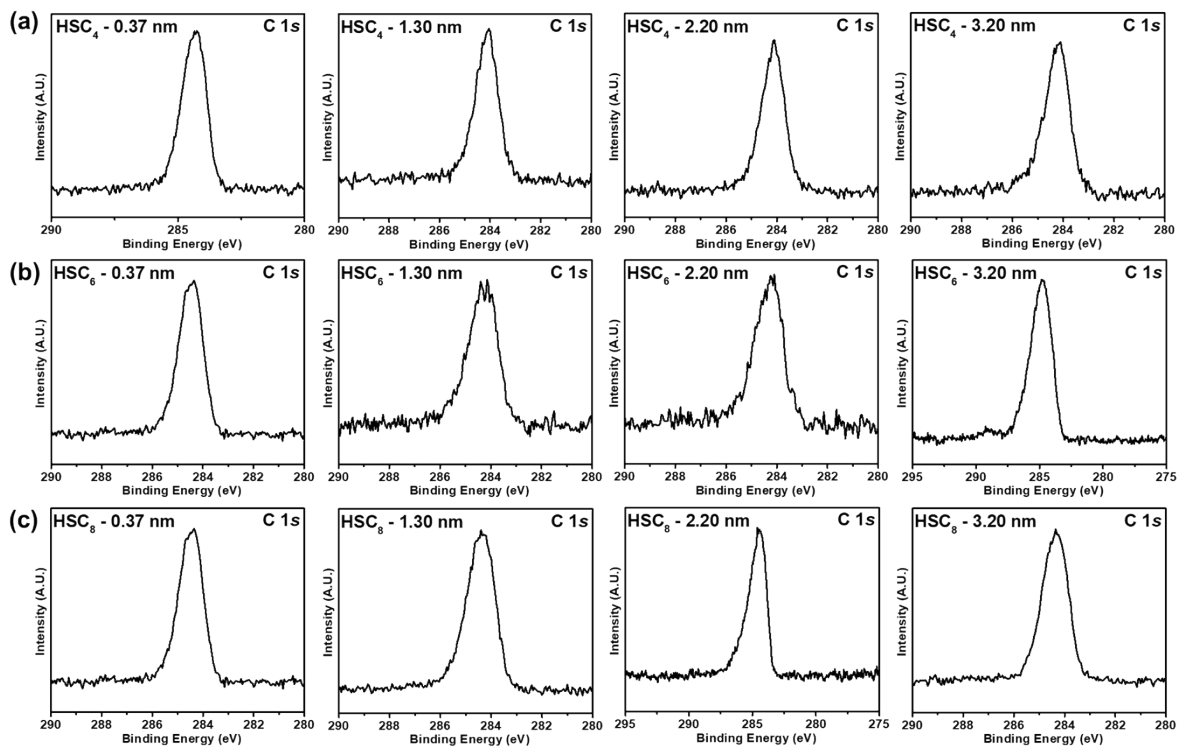

304

305 **Fig. S27.** The high resolution XPS C 1s spectra for Au-SC<sub>m</sub> ( $m = 4, 6, 8$ ) with different surface roughness,

306 including rms = 0.37 nm, 1.30 nm, 2.20 nm, 3.20 nm.

307

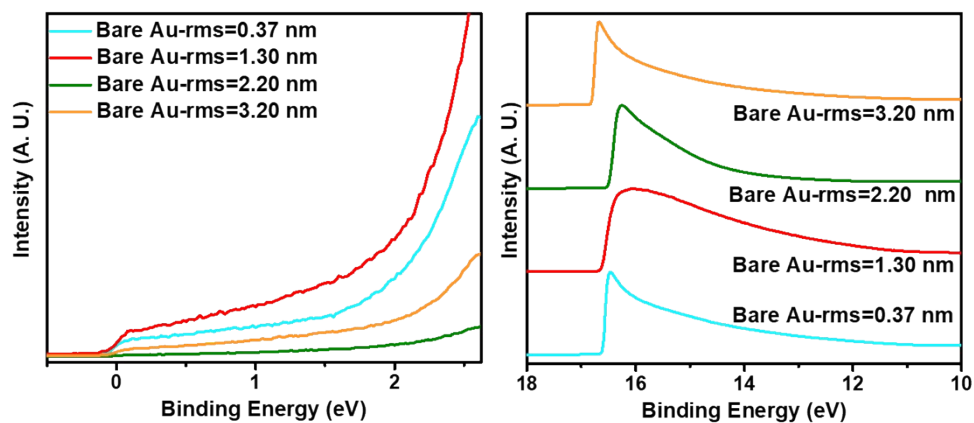

308

309 **Fig. S28.** Ultraviolet photoemission spectroscopy (UPS) for bare Au with diverse rms.

310

311 **Table S1.** Properties of bare Au obtained by UPS.

| Sample      | $E_{\text{cut off}}$ (eV) | WF (eV) |
|-------------|---------------------------|---------|
| rms=0.37 nm | 16.61                     | 4.61    |
| rms=1.30 nm | 16.63                     | 4.59    |
| rms=2.20 nm | 16.50                     | 4.72    |
| rms=3.20 nm | 16.70                     | 4.52    |

312

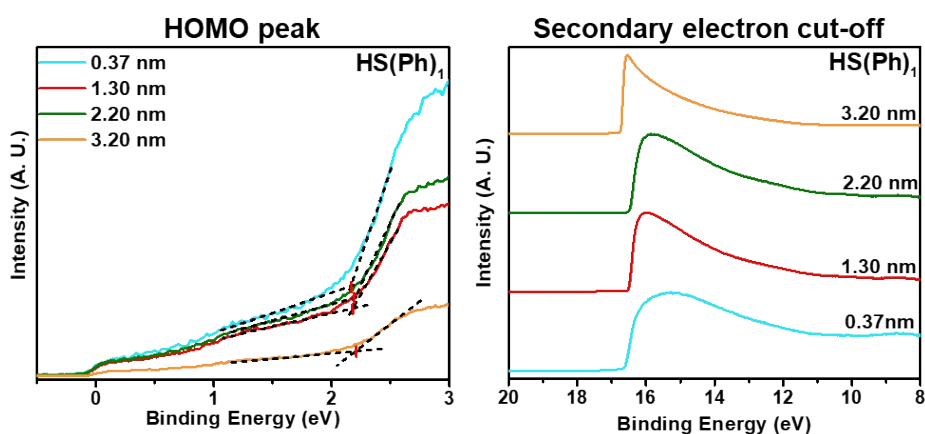

313

314 **Fig. S29.** Valence band and secondary cutoff spectra of the HOMO peak for Au-S(Ph)<sub>1</sub> measured by UPS.

315

316 **Table S2.** Properties of Au-S(Ph)<sub>1</sub> SAMs obtained by UPS.

| Sample      | $\delta E$ (eV) | $E_{\text{cut off}}$ (eV) | WF (eV) | $E_{\text{HOMO}}$ (eV) |
|-------------|-----------------|---------------------------|---------|------------------------|
| rms=0.37 nm | 2.17            | 16.64                     | 4.58    | -6.75                  |
| rms=1.30 nm | 2.18            | 16.50                     | 4.72    | -6.90                  |
| rms=2.20 nm | 2.20            | 16.47                     | 4.75    | -6.95                  |
| rms=3.20 nm | 2.20            | 16.73                     | 4.49    | -6.69                  |

317

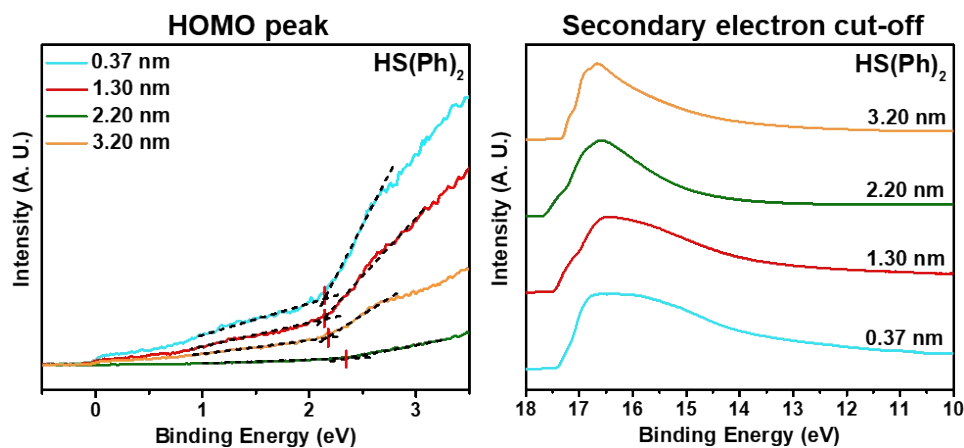

318

319 **Fig. S30.** Valence band and secondary cutoff spectra of the HOMO peak for Au-S(Ph)<sub>2</sub> measured by UPS.

320

321 **Table S3.** Properties of Au-S(Ph)<sub>2</sub> SAMs obtained by UPS.

| Sample      | $\delta E$ (eV) | $E_{\text{cut off}}$ (eV) | WF (eV) | $E_{\text{HOMO}}$ (eV) |
|-------------|-----------------|---------------------------|---------|------------------------|
| rms=0.37 nm | 2.14            | 17.40                     | 3.82    | -5.96                  |
| rms=1.30 nm | 2.13            | 17.48                     | 3.74    | -5.87                  |
| rms=2.20 nm | 2.34            | 17.66                     | 3.56    | -5.90                  |
| rms=3.20 nm | 2.16            | 17.31                     | 3.91    | -6.07                  |

322

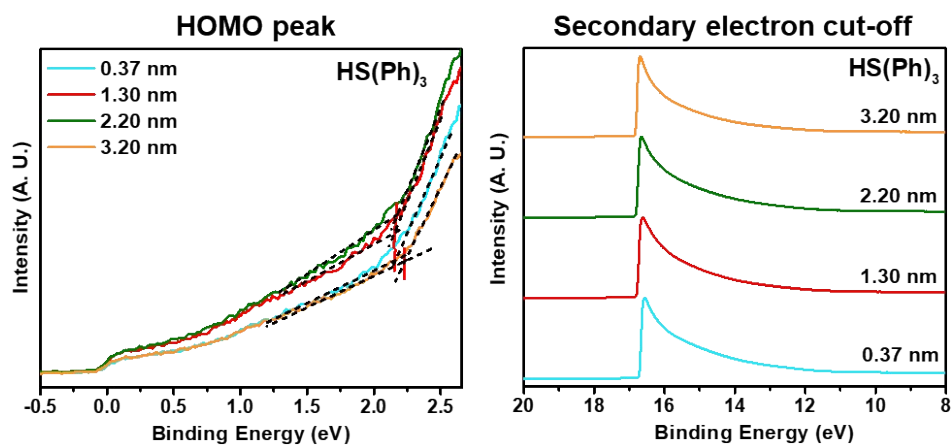

323

324 **Fig. S31.** Valence band and secondary cutoff spectra of the HOMO peak for Au-S(Ph)<sub>3</sub> measured by UPS.

325

326 **Table S4.** Properties of Au-S(Ph)<sub>3</sub> SAMs obtained by UPS.

| Sample      | $\delta E$ (eV) | $E_{\text{cut off}}$ (eV) | WF (eV) | $E_{\text{HOMO}}$ (eV) |
|-------------|-----------------|---------------------------|---------|------------------------|
| rms=0.37 nm | 2.15            | 16.72                     | 4.50    | -6.65                  |
| rms=1.30 nm | 2.15            | 16.78                     | 4.44    | -6.59                  |
| rms=2.20 nm | 2.19            | 16.82                     | 4.40    | -6.59                  |
| rms=3.20 nm | 2.40            | 16.82                     | 4.40    | -6.80                  |

327

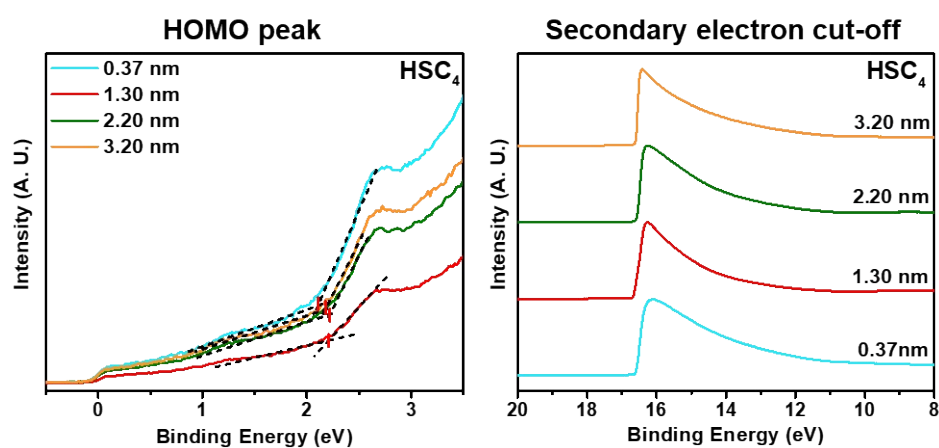

328

329 **Fig. S32.** Valence band and secondary cutoff spectra of the HOMO peak for Au-SC<sub>4</sub> measured by UPS.

330 **Table S5.** Properties of Au-SC<sub>4</sub> SAMs obtained by UPS.

| Sample      | $\delta E$ (eV) | $E_{\text{cut off}}$ (eV) | WF (eV) | $E_{\text{HOMO}}$ (eV) |
|-------------|-----------------|---------------------------|---------|------------------------|
| rms=0.37 nm | 2.11            | 16.60                     | 4.62    | -6.73                  |
| rms=1.30 nm | 2.21            | 16.63                     | 4.59    | -6.80                  |
| rms=2.20 nm | 2.22            | 16.58                     | 4.64    | -6.86                  |
| rms=3.20 nm | 2.17            | 16.61                     | 4.61    | -6.78                  |

331

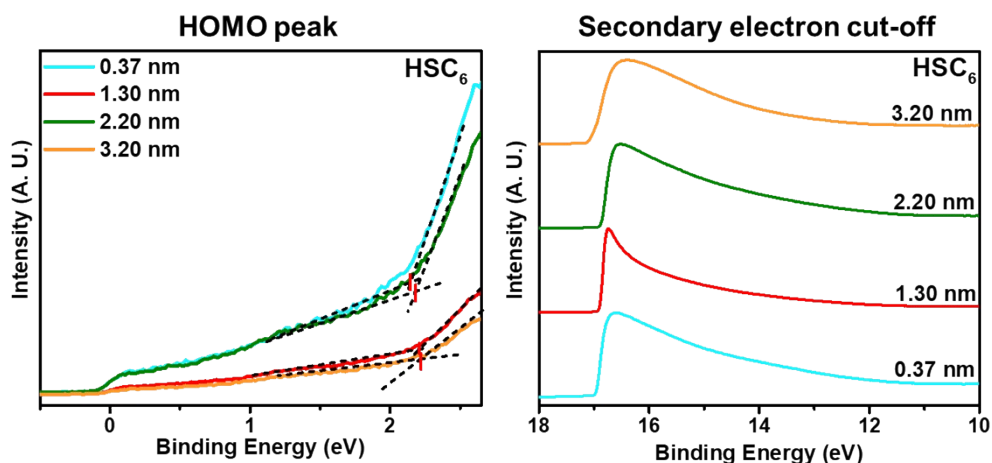

332

333 **Fig. S33.** Valence band and secondary cutoff spectra of the HOMO peak for Au-SC<sub>6</sub> measured by UPS.

334 **Table S6.** Properties of Au-SC<sub>6</sub> SAMs obtained by UPS.

| Sample      | $\delta E$ (eV) | $E_{\text{cut off}}$ (eV) | WF (eV) | $E_{\text{HOMO}}$ (eV) |
|-------------|-----------------|---------------------------|---------|------------------------|
| rms=0.37 nm | 2.09            | 16.98                     | 4.24    | -6.33                  |
| rms=1.30 nm | 2.17            | 16.91                     | 4.31    | -6.48                  |
| rms=2.20 nm | 2.15            | 16.87                     | 4.35    | -6.50                  |
| rms=3.20 nm | 2.24            | 17.06                     | 4.16    | -6.40                  |

335

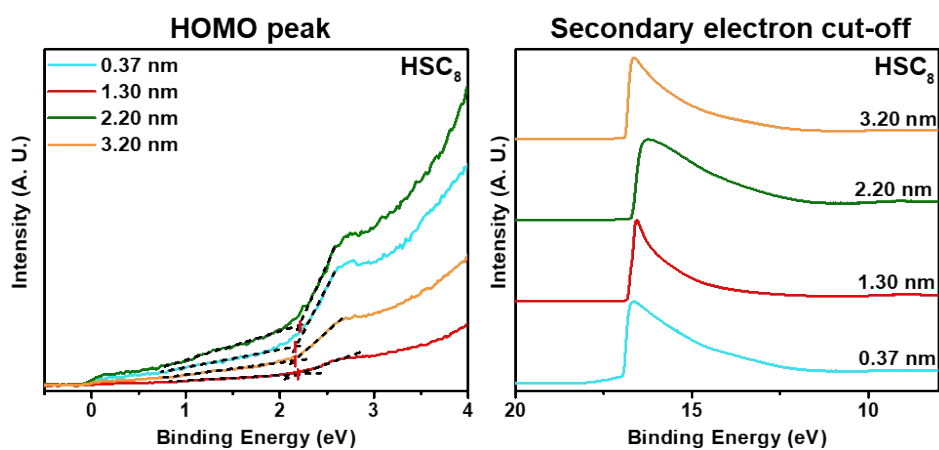

336

337 **Fig. S34.** Valence band and secondary cutoff spectra of the HOMO peak for Au-SC<sub>8</sub> measured by UPS.

338

339 **Table S7.** Properties of Au-SC<sub>8</sub> SAMs obtained by UPS.

| Sample      | $\delta E$ (eV) | $E_{\text{cut off}}$ (eV) | WF (eV) | $E_{\text{HOMO}}$ (eV) |
|-------------|-----------------|---------------------------|---------|------------------------|
| rms=0.37 nm | 2.17            | 16.96                     | 4.26    | -6.43                  |
| rms=1.30 nm | 2.19            | 16.84                     | 4.38    | -6.55                  |
| rms=2.20 nm | 2.20            | 16.71                     | 4.51    | -6.71                  |
| rms=3.20 nm | 2.15            | 16.88                     | 4.34    | -6.49                  |

340

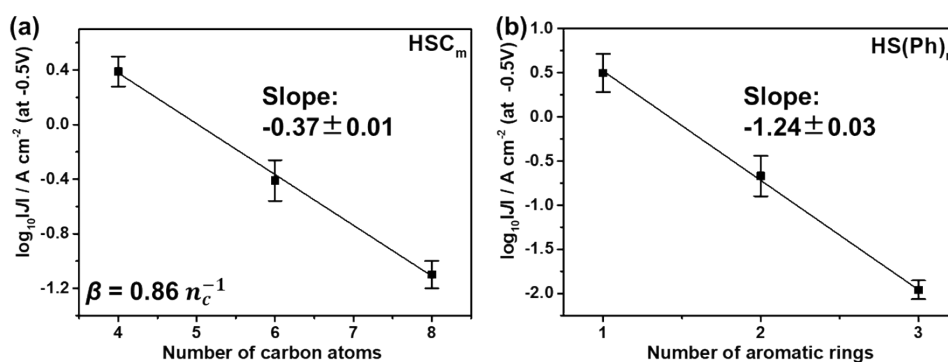

341

342 **Fig. S35.** Plots of  $\log |J|$  at -0.50 V versus number of carbon atoms or aromatic rings for junctions  
 343 incorporating SAMs of (a) HSC<sub>m</sub> ( $m = 4, 6, 8$ ) and (b) HS(Ph)<sub>n</sub> ( $n = 1, 2, 3$ ). The solid lines are fits to the  
 344 Simmons Equation.

345

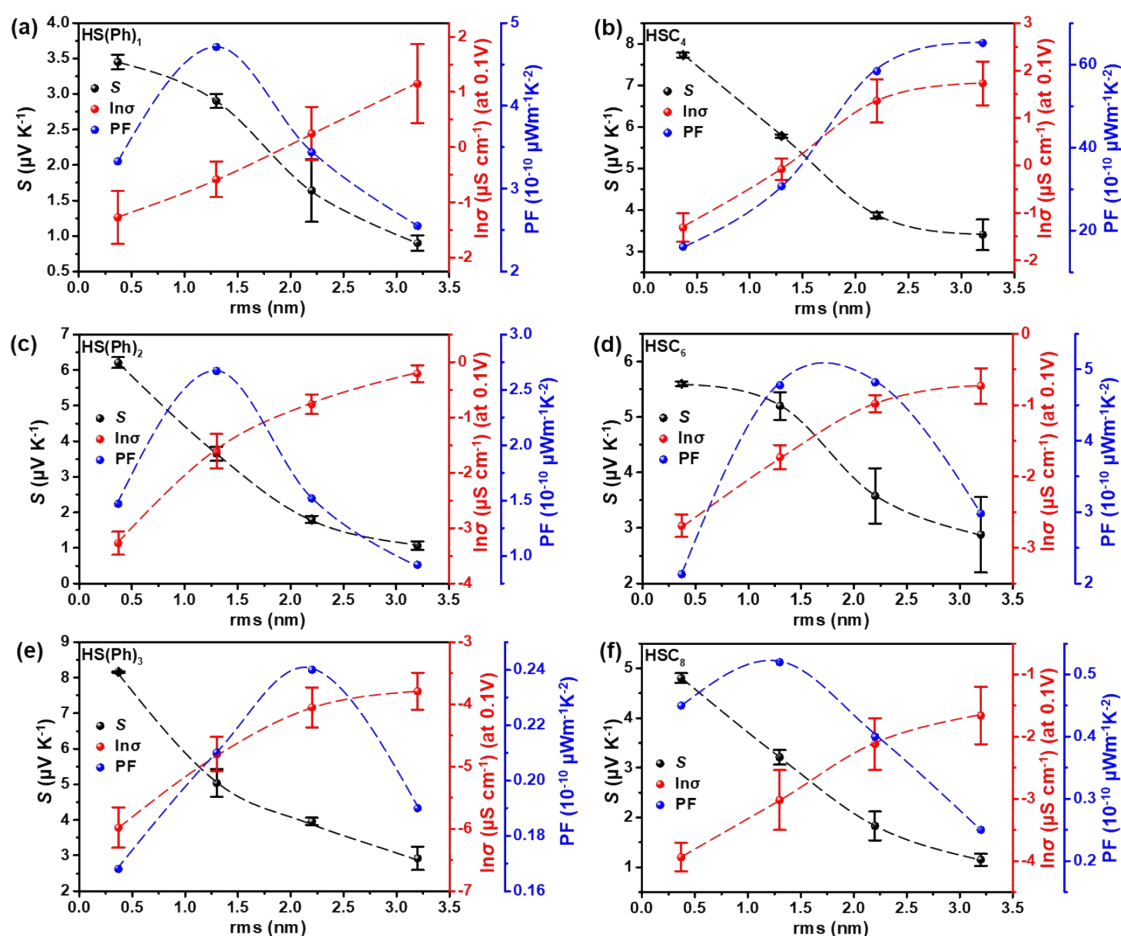

346

347 **Fig. S36. The power factor as a function of surface roughness.**  $S$ ,  $\ln \sigma$  (at 0.1V) and PF as a function of rms  
 348 roughness for  $\text{HS(Ph)}_n$  ( $n = 1, 2, 3$ ) and  $\text{HSC}_m$  ( $m = 4, 6, 8$ ). The dashed lines are a visual guide.

349

350 **Table S8** Summary of molecular length ( $d$ ) determined by ChemDraw software.

|         | $\text{HS(Ph)}_1$ | $\text{HS(Ph)}_2$ | $\text{HS(Ph)}_3$ | $\text{HSC}_4$ | $\text{HSC}_6$ | $\text{HSC}_8$ |
|---------|-------------------|-------------------|-------------------|----------------|----------------|----------------|
| $l$ (Å) | 4.59              | 8.72              | 12.92             | 5.27           | 7.82           | 10.37          |

351

352

353

## 354 References

- 355 1. Liu, Y.; Kim, J.; Seo, H.; Park, S.; Chae, J., Copper(II)-catalyzed single-step synthesis of  
 356 Aryl thiols from Aryl halides and 1,2-ethanedithiol. *Adv.Synth. Catal.* **2015**, 357, 2205.  
 357 2. Yuan, L.; Jiang, L.; Zhang, B.; Nijhuis, C. A., Dependency of the tunneling decay  
 358 coefficient in molecular tunneling junctions on the topography of the bottom electrodes. *Angew.*  
 359 *Chem. Int. Edit.* **2014**, 53, 3377.

- 360 3. Yuan, L.; Jiang, L.; Thompson, D.; Nijhuis, C. A., On the remarkable role of surface  
361 topography of the bottom electrodes in blocking leakage currents in molecular diodes. *J. Am.*  
362 *Chem. Soc.* **2014**, *136*, 6554.
- 363 4. Doniach, S.; Sunjic, M., Many-electron singularity in X-ray photoemission and X-ray line  
364 spectra from metals. *J. Phys. C Solid State Phys.* **1970**, *3*, 285.
- 365 5. Kumar, S.; Soni, S.; Danowski, W.; van Beek, C. L. F.; Feringa, B. L.; Rudolf, P.; Chiechi,  
366 R. C., Correlating the influence of disulfides in monolayers across photoelectron spectroscopy  
367 wettability and tunneling charge-transport. *J Am. Chem. Soc.* **2020**, *142*, 15075.
- 368 6. Nerngchamnong, N.; Yuan, L.; Qi, D. C.; Li, J.; Thompson, D.; Nijhuis, C. A., The role of  
369 van der Waals forces in the performance of molecular diodes. *Nat. Nanotechnol.* **2013**, *8*, 113.
- 370 7. Yu, S.; Kaviani, M., Electrical, thermal, and species transport properties of liquid eutectic  
371 Ga-In and Ga-In-Sn from first principles. *J. Chem. Phys.* **2014**, *140*, 064303.
- 372 8. Fflis, P.; Kirsch, L.; Andruczyk, D.; Curreli, D.; Ruzic, D. N., Seebeck coefficient  
373 measurements on Li, Sn, Ta, Mo, and W. *J. Nucl. Mater.* **2013**, *438*, 224.
- 374 9. Cui, L.; Hur, S.; Akbar, Z. A.; Klockner, J. C.; Jeong, W.; Pauly, F.; Jang, S. Y.; Reddy, P.;  
375 Meyhofer, E., Thermal conductance of single-molecule junctions. *Nature* **2019**, *572*, 628.
- 376 10. Rincón-García, L.; Evangeli, C.; Rubio-Bollinger, G.; Agraït, N., Thermopower  
377 measurements in molecular junctions. *Chem. Soc. Rev.* **2016**, *45*, 4285.
- 378 11. Park, S.; Kang, S.; Yoon, H. J., Power factor of one molecule thick films and length  
379 dependence. *ACS Cent. Sci.* **2019**, *5*, 1975.
- 380
